# Supplementary material for: Biodiversity enhances ecosystem multifunctionality across trophic levels and habitats
Source: PubMed Central journal article supplement (PMC4423209; doi:10.1038/ncomms7936), 2015-04-24
Supplement: ncomms7936-s1.pdf [file ncomms7936-s1.pdf]

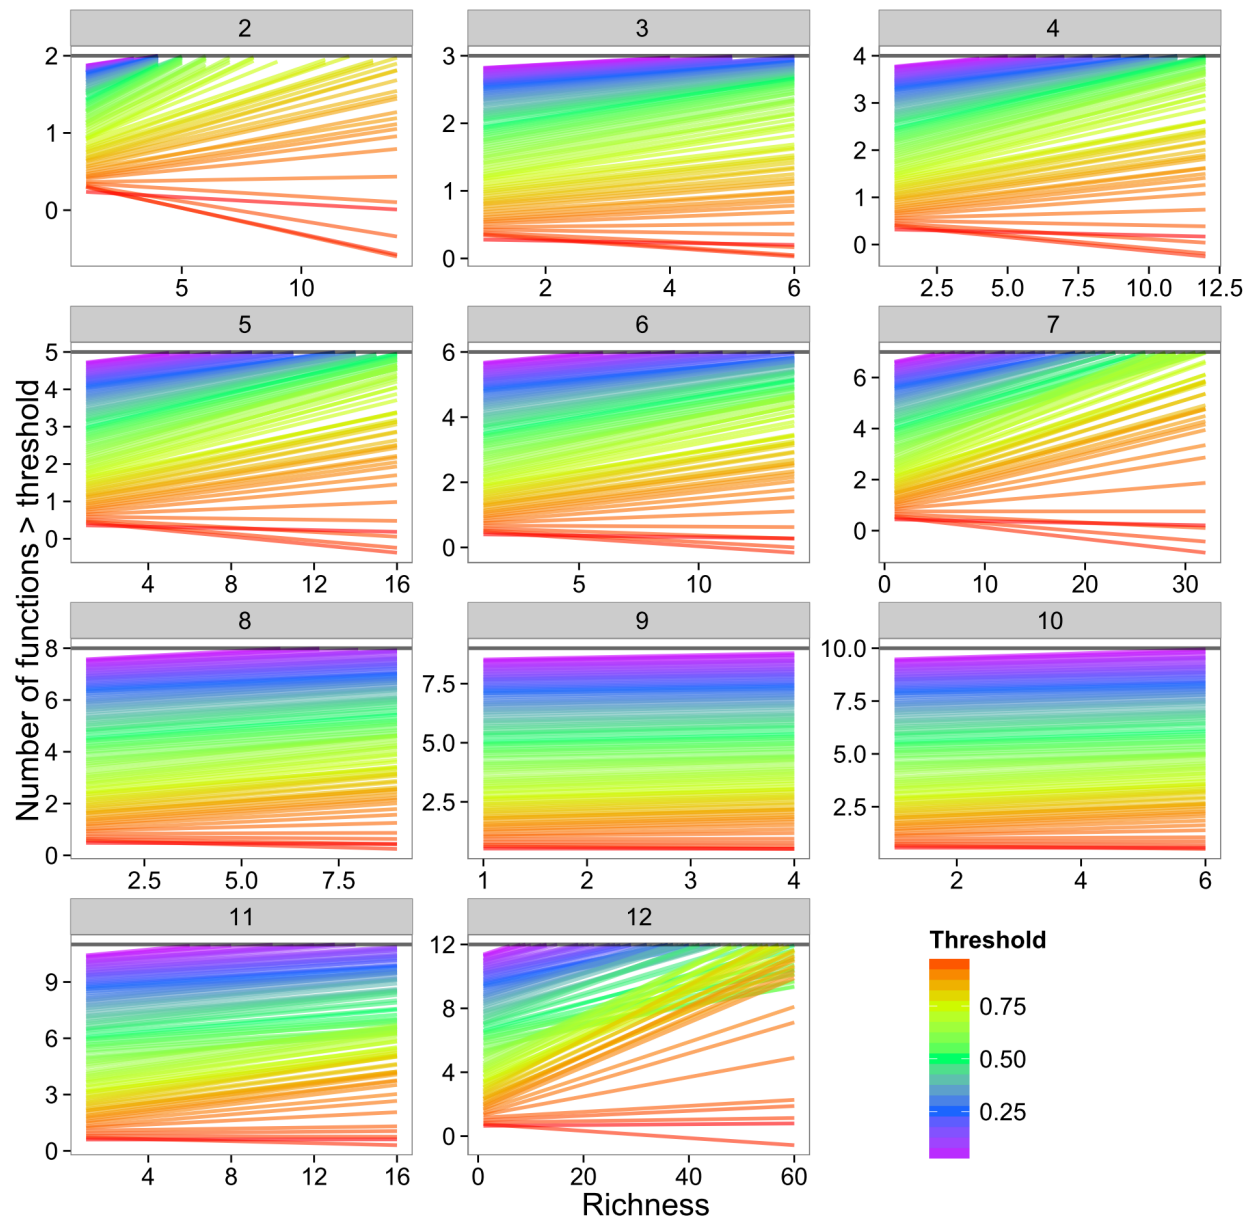

**Supplementary Figure 1: The number of functions greater than a threshold against richness, for each level of number of functions (2-12).** The raw number of functions greater than a threshold against richness, for thresholds ranging from 1% of the maximum (purple lines) to 99% of the maximum (red lines). Lines are predicted fits from generalized linear mixed effects models that fixed the covariate number of functions at the number indicated in the panel headers.

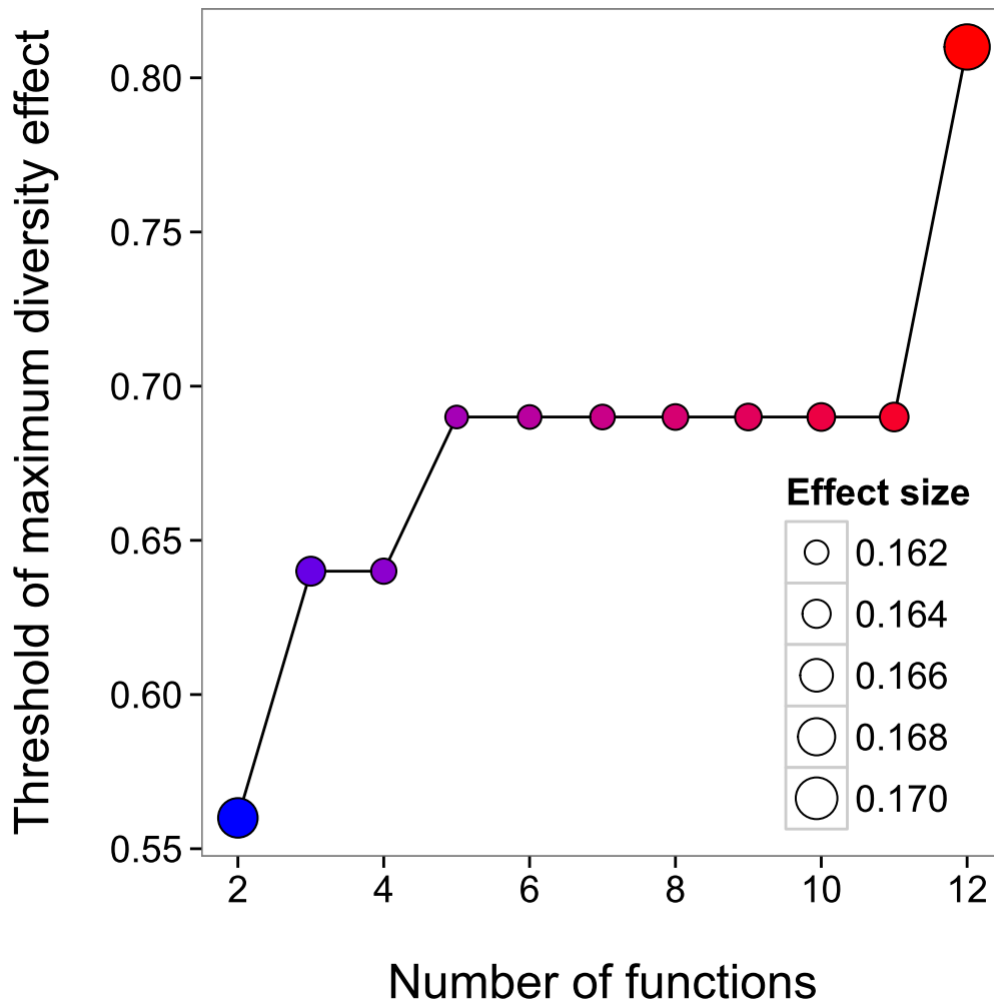

**Supplementary Figure 2: The threshold where diversity has its maximum effect increased with the number of functions.** The size of the points corresponds to the maximum effect size for each level of number of functions. Shading indicates the gradient from 2 functions (blue) to 12 functions (red).

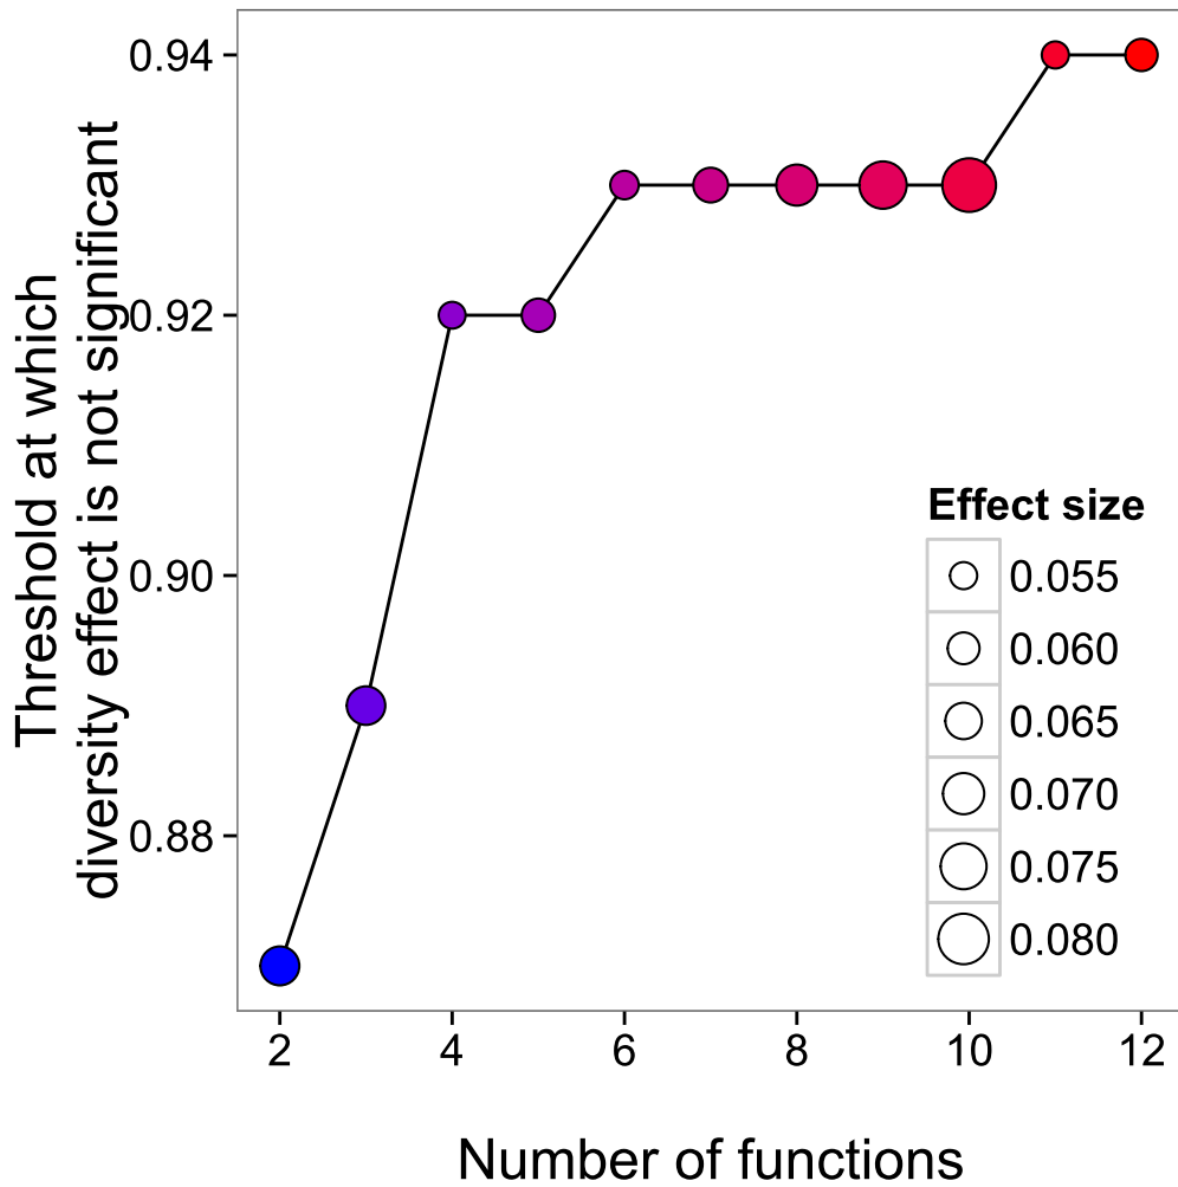

**Supplementary Figure 3: The threshold after which diversity no longer has a significant effect increased with the number of functions.** The size of the points corresponds to the effect size for each level of number of functions. Shading indicates the gradient from 2 functions (blue) to 12 functions (red).

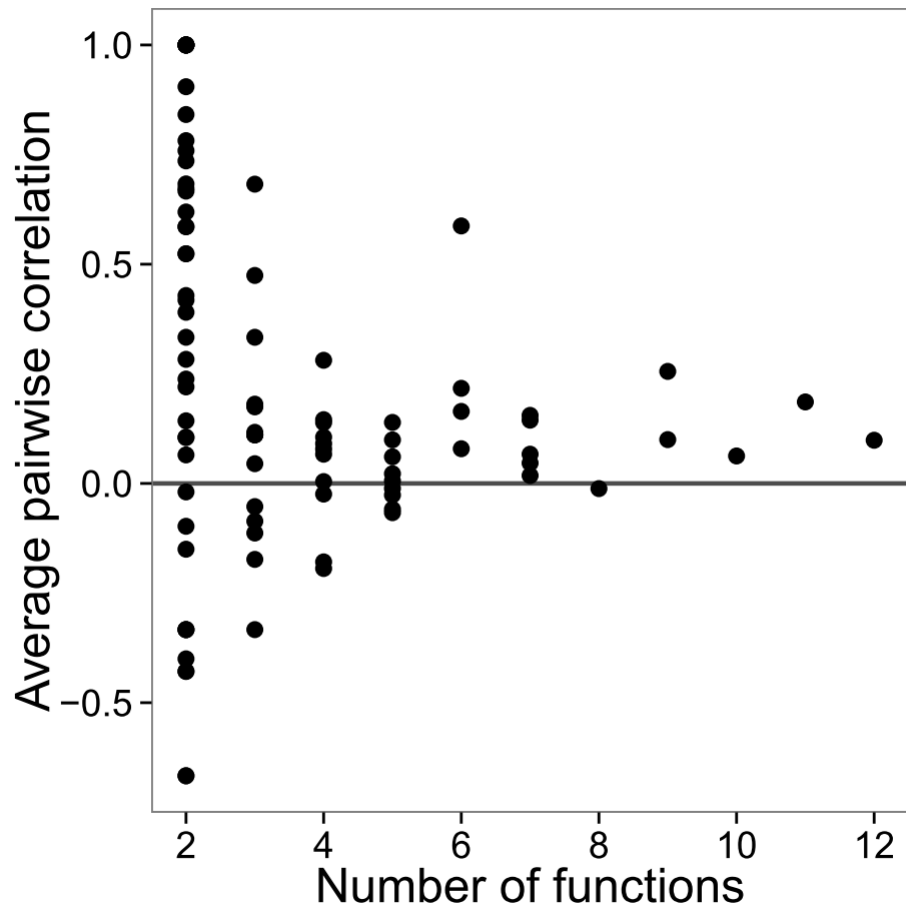

**Supplementary Figure 4: The average pairwise correlation among all functions within a given experiment generally decreased with an increasing number of functions. Correlations were calculated as Kendall's rank correlations.**

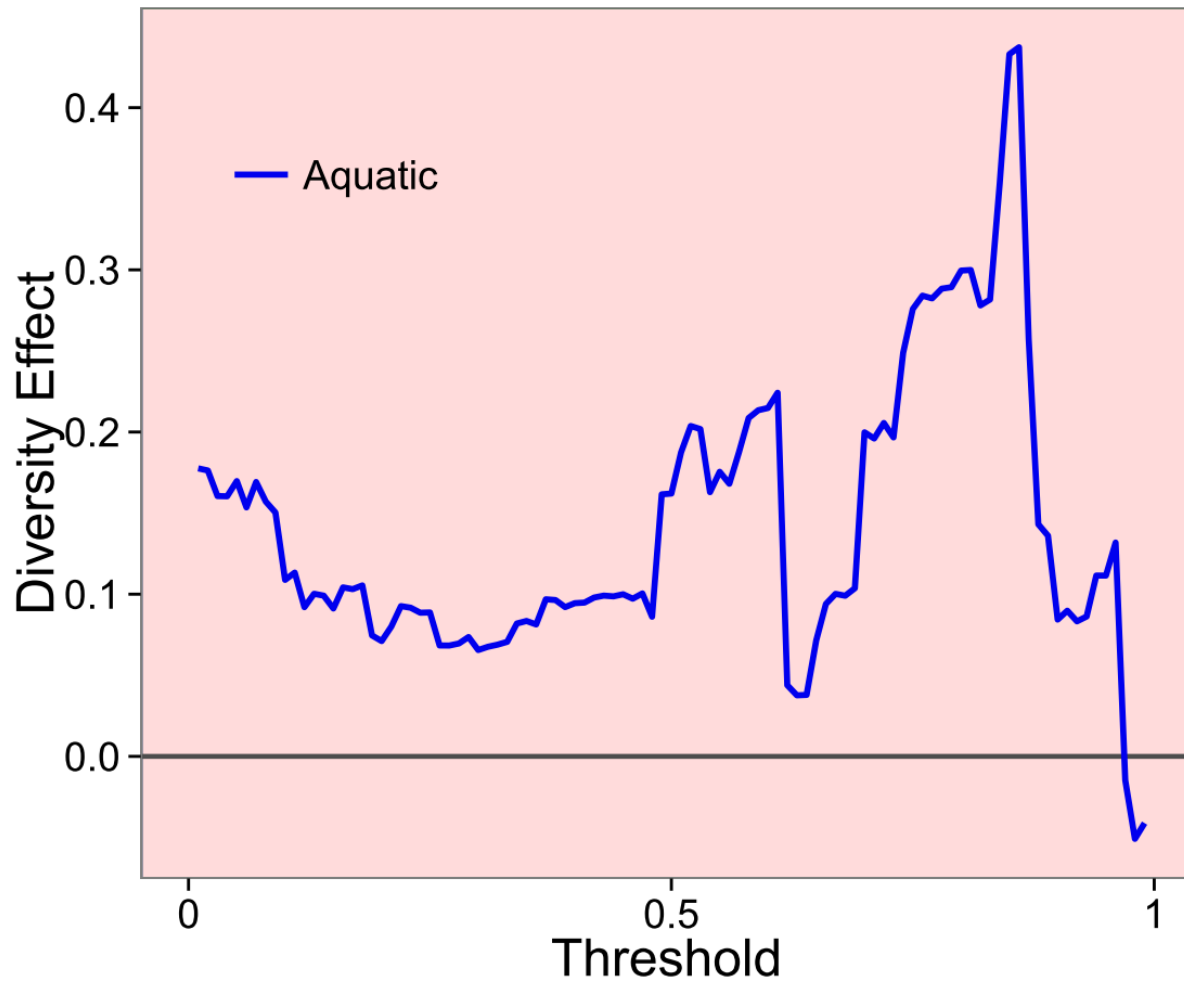

**Supplementary Figure 5: The effect of diversity against threshold was highly variable for carnivores.**

The effect of biodiversity (linear coefficient regressing the number of functions above a threshold against richness) plotted against the continuum of thresholds from 1-99% of the maximum observed level of functioning. The blue line represents trends from experiments conducted in aquatic systems.

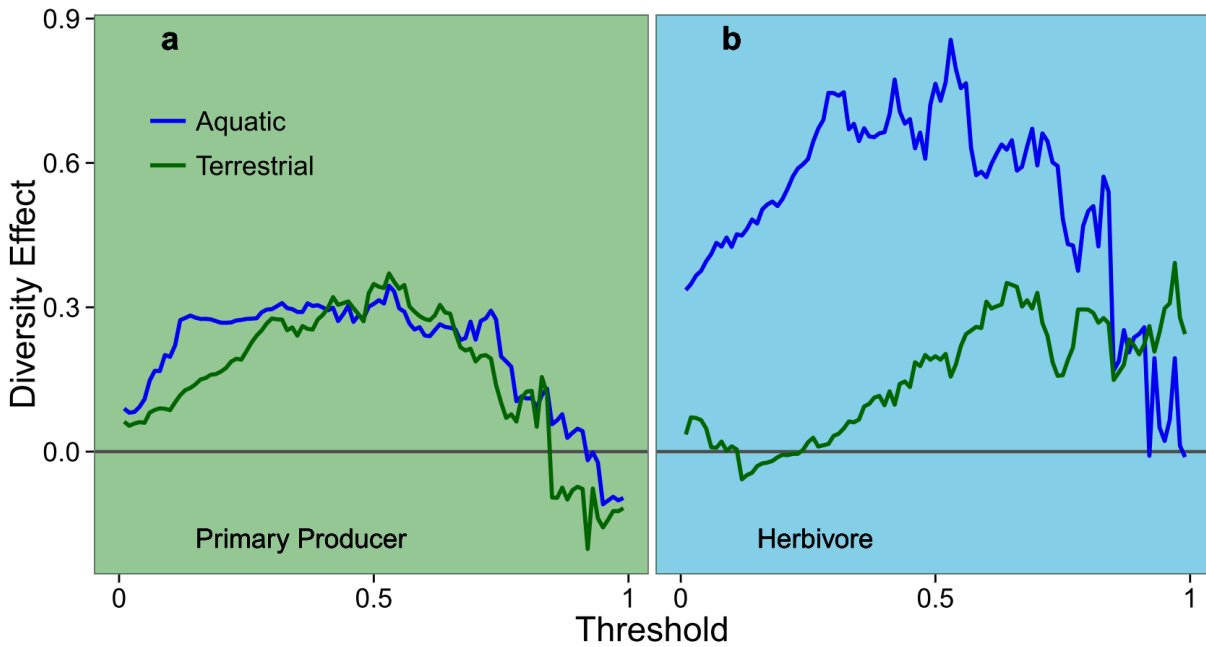

**Supplementary Figure 6: Omitting all treatments where the number of species manipulated was  $S \leq 6$  revealed stronger effects for herbivores than for plants.** The effect of biodiversity (linear coefficient regressing the number of functions above a threshold against richness) plotted against the continuum of thresholds from 1-99% of the maximum observed level of function for **(a)** plants, and **(b)** herbivores. Blue lines represent trends from experiments conducted in aquatic systems, and green lines from terrestrial systems.

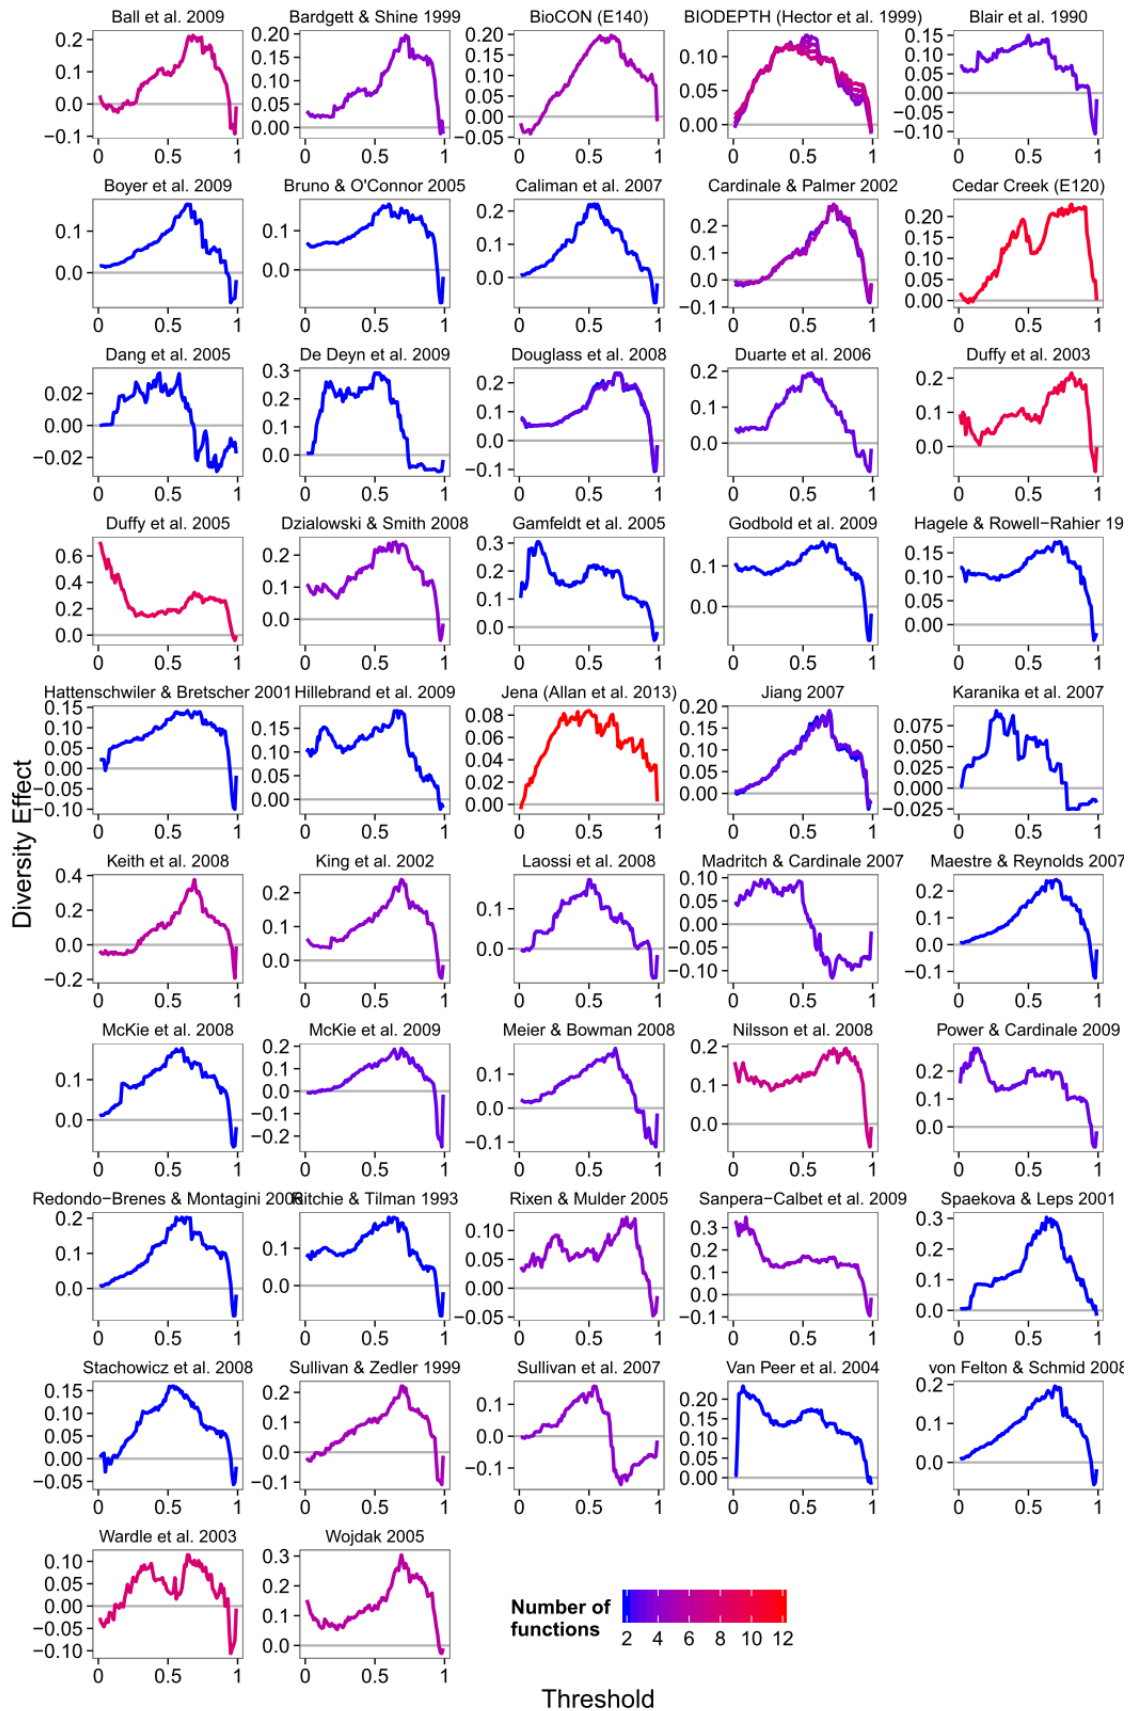

**Supplementary Figure 7: Linear coefficients plotted against threshold for each study in the database.**

The effect of biodiversity (linear coefficient regressing the number of functions above a threshold against richness) plotted against the continuum of thresholds from 1-99% of the maximum observed level of functioning. Shading indicates the number of functions measured in each study from 2 (blue) to 12 (red). Panel headers correspond to studies used in the main analysis (see Supplementary Table 1).





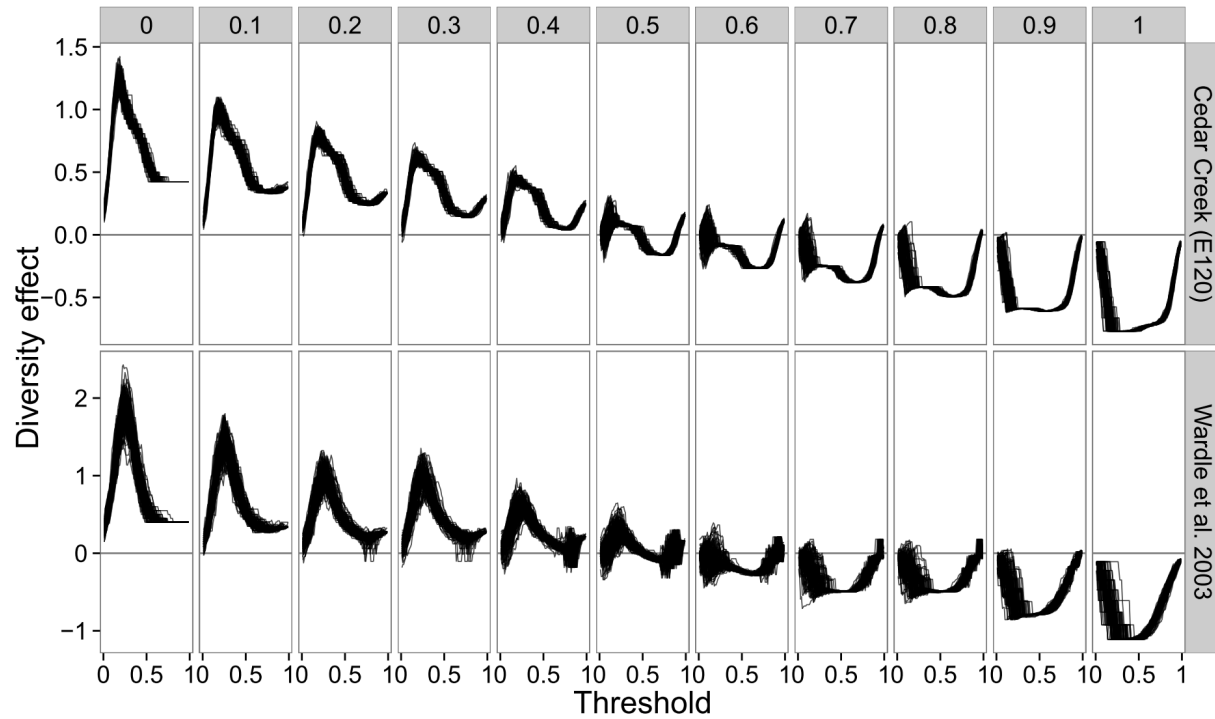

1

2 **Supplementary Figure 9: Simulations showed that the distribution of diversity effects against**  
 3 **threshold changed from concave-up to concave-down with an increasing proportion of negative**  
 4 **effects (top panels, in increments of 0.1).** Each line represents one of 100 runs of the simulation. The  
 5 top row corresponds to parameters (richness, number of functions measured, diversity treatments)  
 6 extracted from<sup>1</sup>, and the bottom from<sup>2</sup>.

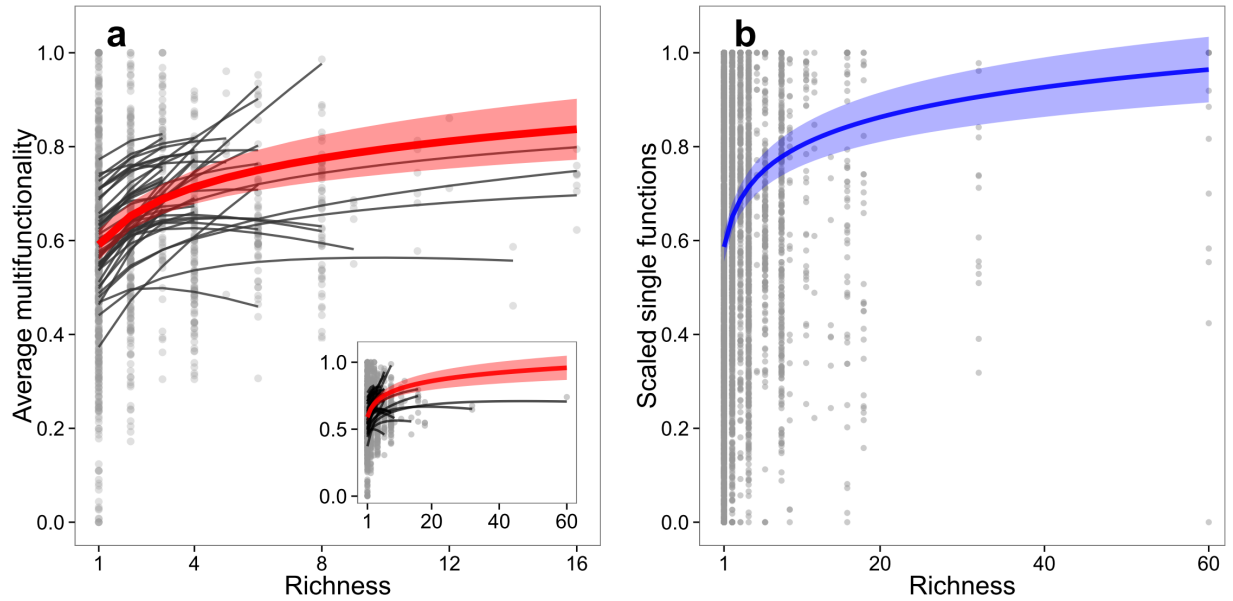

7

8 **Supplementary Figure 10: Average multifunctionality showed a positive but decelerating relationship**

9 **with richness. (a)** The overall trend extracted from a generalized linear mixed effects model is given by

10 the red line  $\pm$  shaded 95% confidence intervals. Individual functions (points) and studies (black lines)

11 varied in their response to increasing richness, but in many cases showed a similar trend. The main

12 graphic shows the predicted trend for experiments that manipulated 16 or fewer species (96% of the

13 dataset), while the inset shows this trend across all experiments in the dataset. **(b)** However, this trend

14 was no different than a pooled analysis of single functions given by the blue line  $\pm$  shaded 95%

15 confidence intervals.

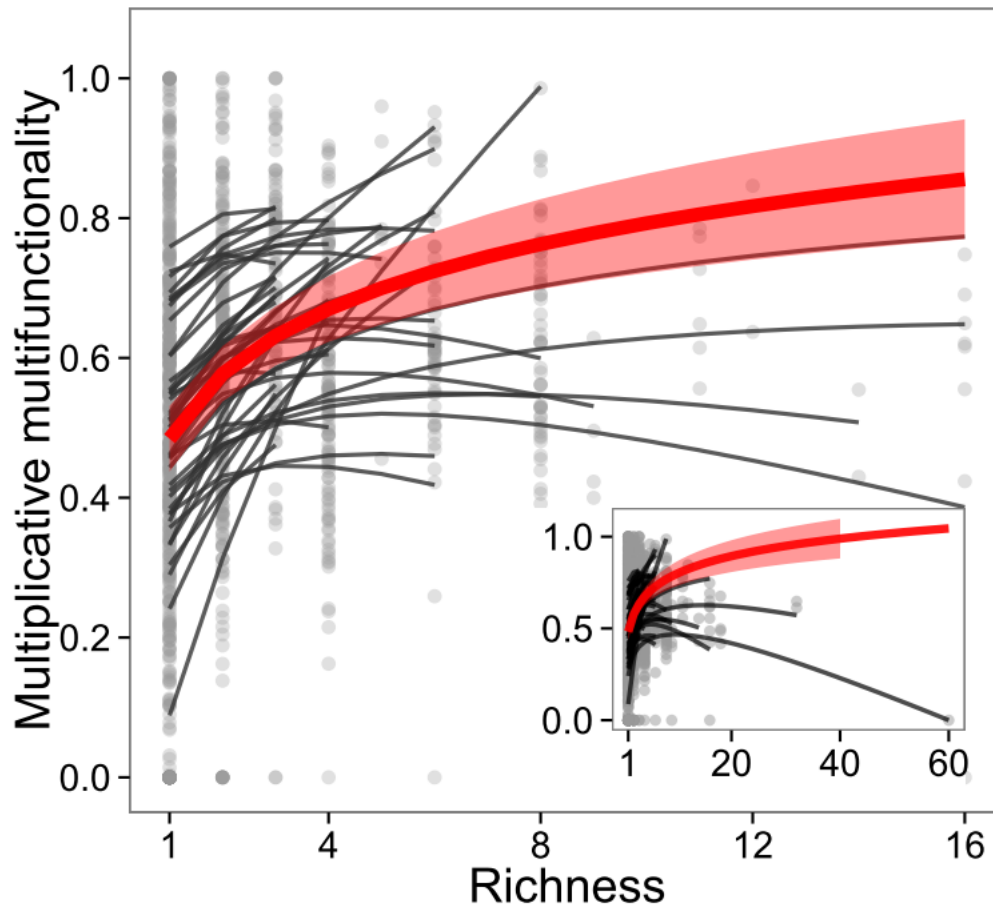

16

17 **Supplementary Figure 11: Multiplicative multifunctionality showed a positive but decelerating**

18 **relationship with richness. (a)** The overall trend extracted from a generalized linear mixed effects model

19 is given by the red line  $\pm$  shaded 95% confidence intervals. Individual functions (points) and studies

20 (black lines) varied in their response to increasing richness, but in many cases showed a similar trend.

21 The main graphic shows the predicted trend for experiments that manipulated 16 or fewer species (96%

22 of the dataset), while the inset shows this trend across all experiments in the dataset.

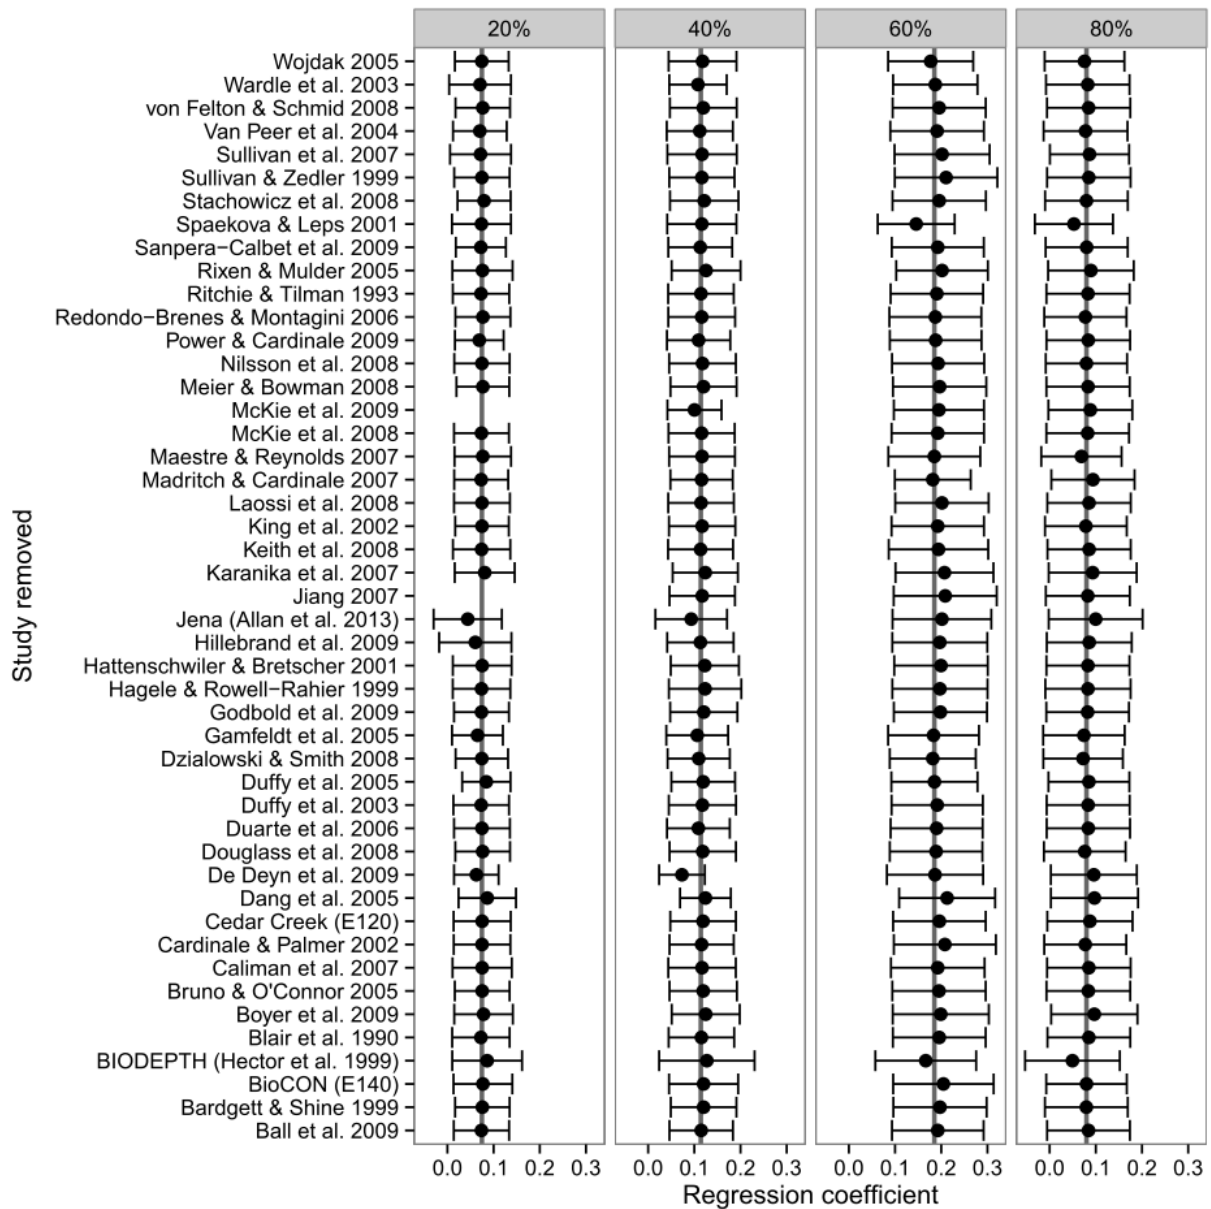

23

24 **Supplementary Figure 12: Sensitivity analysis revealed that our results were robust to loss of any**  
 25 **given study.** Each point corresponds to the regression coefficient of the richness effect extracted from a  
 26 generalized linear mixed effects model run on the reduced dataset missing the single study indicated on  
 27 the y-axis. The error bars represent 95% confidence intervals, and the solid black line represents the  
 28 overall regression coefficient obtained from a GLMM on the entire dataset. Each panel represents  
 29 thresholds of 20, 40, 60, and 80% of the maximum.

| Reference                                  | Expt | System | Trophic Group       | Max S | Max F | r     |
|--------------------------------------------|------|--------|---------------------|-------|-------|-------|
| Ball et al. 2009 <sup>3</sup>              | 1    | T      | Dead organic matter | 4     | 7     | 0.07  |
| Bardgett & Shine 1999 <sup>4</sup>         | 1    | T      | Dead organic matter | 6     | 4     | 0.09  |
| BioCON (E140) <sup>5</sup>                 | 1    | T      | Primary Producer    | 16    | 5     | 0.02  |
| BioCON (E140) <sup>5</sup>                 | 2    | T      | Primary Producer    | 16    | 5     | 0.14  |
| BioCON (E140) <sup>5</sup>                 | 3    | T      | Primary Producer    | 16    | 5     | 0.10  |
| BioCON (E140) <sup>5</sup>                 | 4    | T      | Primary Producer    | 16    | 5     | 0.01  |
| BIODEPTH (Hector et al. 1999) <sup>6</sup> | 1    | T      | Primary Producer    | 16    | 5     | 0.06  |
| BIODEPTH (Hector et al. 1999) <sup>6</sup> | 2    | T      | Primary Producer    | 18    | 7     | 0.14  |
| BIODEPTH (Hector et al. 1999) <sup>6</sup> | 3    | T      | Primary Producer    | 8     | 5     | -0.01 |
| BIODEPTH (Hector et al. 1999) <sup>6</sup> | 4    | T      | Primary Producer    | 14    | 6     | 0.16  |
| BIODEPTH (Hector et al. 1999) <sup>6</sup> | 5    | T      | Primary Producer    | 12    | 4     | 0.14  |
| BIODEPTH (Hector et al. 1999) <sup>6</sup> | 6    | T      | Primary Producer    | 11    | 7     | 0.16  |
| BIODEPTH (Hector et al. 1999) <sup>6</sup> | 7    | T      | Primary Producer    | 12    | 6     | 0.22  |
| BIODEPTH (Hector et al. 1999) <sup>6</sup> | 8    | T      | Primary Producer    | 32    | 7     | 0.05  |
| Blair et al. 1990 <sup>7</sup>             | 1    | T      | Dead organic matter | 3     | 3     | -0.33 |
| Boyer et al. 2009 <sup>8</sup>             | 1    | A      | Primary Producer    | 6     | 2     | 0.39  |
| Boyer et al. 2009 <sup>8</sup>             | 2    | A      | Primary Producer    | 6     | 2     | 0.62  |
| Boyer et al. 2009 <sup>8</sup>             | 3    | A      | Primary Producer    | 6     | 2     | -0.43 |
| Boyer et al. 2009 <sup>8</sup>             | 4    | A      | Primary Producer    | 6     | 2     | 0.24  |
| Bruno & O'Connor 2005 <sup>9</sup>         | 1    | A      | Carnivore           | 5     | 2     | -0.15 |
| Caliman et al. 2007 <sup>10</sup>          | 1    | A      | Detritivore         | 3     | 2     | 1.00  |
| Caliman et al. 2007 <sup>10</sup>          | 2    | A      | Detritivore         | 3     | 2     | 1.00  |
| Caliman et al. 2007 <sup>10</sup>          | 3    | A      | Detritivore         | 3     | 2     | 0.90  |
| Cardinale & Palmer 2002 <sup>11</sup>      | 1    | A      | Detritivore         | 3     | 5     | -0.06 |
| Cardinale & Palmer 2002 <sup>11</sup>      | 2    | A      | Detritivore         | 3     | 3     | 0.18  |
| Cedar Creek (E120) <sup>1</sup>            | 1    | T      | Primary Producer    | 17    | 11    | 0.19  |
| Dang et al. 2005 <sup>12</sup>             | 1    | A      | Detritivore         | 8     | 2     | -0.10 |
| Dang et al. 2005 <sup>12</sup>             | 2    | A      | Detritivore         | 8     | 2     | 0.07  |
| Dang et al. 2005 <sup>12</sup>             | 3    | A      | Detritivore         | 8     | 2     | 0.10  |
| De Deyn et al. 2009 <sup>13</sup>          | 1    | T      | Primary Producer    | 6     | 2     | 0.74  |
| De Deyn et al. 2009 <sup>13</sup>          | 2    | T      | Primary Producer    | 6     | 2     | 0.84  |
| Douglass et al. 2008 <sup>14</sup>         | 1    | A      | Herbivore           | 3     | 2     | -0.33 |
| Douglass et al. 2008 <sup>14</sup>         | 2    | A      | Herbivore           | 3     | 3     | 0.11  |
| Douglass et al. 2008 <sup>14</sup>         | 3    | A      | Herbivore           | 3     | 3     | 0.11  |
| Douglass et al. 2008 <sup>14</sup>         | 4    | A      | Herbivore           | 3     | 3     | 0.11  |
| Douglass et al. 2008 <sup>14</sup>         | 5    | A      | Carnivore           | 3     | 3     | 0.11  |
| Duarte et al. 2006 <sup>15</sup>           | 1    | A      | Detritivore         | 4     | 3     | 0.11  |
| Duffy et al. 2003 <sup>16</sup>            | 1    | A      | Herbivore           | 6     | 10    | 0.06  |
| Duffy et al. 2005 <sup>17</sup>            | 1    | A      | Herbivore           | 4     | 9     | 0.26  |
| Duffy et al. 2005 <sup>17</sup>            | 2    | A      | Herbivore           | 4     | 9     | 0.10  |
| Dzialowski & Smith 2008 <sup>18</sup>      | 1    | A      | Herbivore           | 4     | 4     | 0.28  |
| Dzialowski & Smith 2008 <sup>18</sup>      | 2    | A      | Herbivore           | 4     | 4     | 0.08  |
| Gamfeldt et al. 2005 <sup>19</sup>         | 1    | A      | Herbivore           | 3     | 2     | 1.00  |

|                                               |   |   |                     |    |    |       |
|-----------------------------------------------|---|---|---------------------|----|----|-------|
| Gamfeldt et al. 2005 <sup>19</sup>            | 2 | A | Primary Producer    | 3  | 2  | 0.67  |
| Godbold et al. 2009 <sup>20</sup>             | 1 | A | Herbivore           | 3  | 2  | -0.67 |
| Hägele & Rowell-Rahier 1999 <sup>21</sup>     | 1 | T | Primary Producer    | 6  | 2  | 0.59  |
| Hägele & Rowell-Rahier 1999 <sup>21</sup>     | 2 | T | Primary Producer    | 6  | 2  | 0.14  |
| Hägele & Rowell-Rahier 1999 <sup>21</sup>     | 3 | T | Primary Producer    | 6  | 2  | 0.52  |
| Hättenschwiler & Bretscher 2001 <sup>22</sup> | 1 | T | Dead organic matter | 3  | 2  | -0.33 |
| Hättenschwiler & Bretscher 2001 <sup>22</sup> | 2 | T | Dead organic matter | 3  | 2  | -0.67 |
| Hillebrand et al. 2009 <sup>23</sup>          | 1 | A | Herbivore           | 6  | 2  | 0.28  |
| Hillebrand et al. 2009 <sup>23</sup>          | 2 | A | Herbivore           | 4  | 2  | 0.22  |
| Jena Experiment <sup>24</sup>                 | 1 | T | Primary Producer    | 60 | 12 | 0.10  |
| Jiang 2007 <sup>25</sup>                      | 1 | A | Detritivore         | 4  | 2  | -0.02 |
| Jiang 2007 <sup>25</sup>                      | 2 | A | Detritivore         | 4  | 3  | -0.09 |
| Karanika et al. 2007 <sup>26</sup>            | 1 | T | Primary Producer    | 14 | 2  | 0.76  |
| Keith et al. 2008 <sup>27</sup>               | 1 | T | Dead organic matter | 5  | 6  | 0.08  |
| King et al. 2002 <sup>28</sup>                | 1 | T | Dead organic matter | 4  | 4  | 0.07  |
| Laossi et al. 2008 <sup>29</sup>              | 1 | T | Primary Producer    | 4  | 3  | 0.47  |
| Madritch & Cardinale 2007 <sup>30</sup>       | 1 | T | Dead organic matter | 6  | 3  | 0.05  |
| Madritch & Cardinale 2007 <sup>30</sup>       | 2 | T | Dead organic matter | 6  | 3  | -0.11 |
| Madritch & Cardinale 2007 <sup>30</sup>       | 3 | T | Dead organic matter | 6  | 3  | -0.17 |
| Maestre & Reynolds 2007 <sup>31</sup>         | 1 | T | Primary Producer    | 3  | 2  | 0.52  |
| Maestre & Reynolds 2007 <sup>31</sup>         | 2 | T | Primary Producer    | 3  | 2  | 0.59  |
| Maestre & Reynolds 2007 <sup>31</sup>         | 3 | T | Primary Producer    | 3  | 2  | 0.68  |
| Maestre & Reynolds 2007 <sup>31</sup>         | 4 | T | Primary Producer    | 3  | 2  | 0.43  |
| McKie et al. 2008 <sup>32</sup>               | 1 | A | Detritivore         | 3  | 2  | 0.33  |
| McKie et al. 2009 <sup>33</sup>               | 1 | A | Detritivore         | 3  | 3  | 0.17  |
| McKie et al. 2009 <sup>33</sup>               | 2 | A | Detritivore         | 3  | 3  | 0.18  |
| McKie et al. 2009 <sup>33</sup>               | 3 | A | Detritivore         | 3  | 3  | 0.12  |
| McKie et al. 2009 <sup>33</sup>               | 4 | A | Detritivore         | 3  | 3  | 0.68  |
| Meier & Bowman 2008 <sup>34</sup>             | 1 | T | Dead organic matter | 4  | 3  | -0.05 |
| Nilsson et al. 2008 <sup>35</sup>             | 1 | A | Carnivore           | 3  | 7  | 0.02  |
| Power & Cardinale 2009 <sup>36</sup>          | 1 | A | Primary Producer    | 5  | 3  | 0.33  |
| Redondo-Brenes & Montagini 2006 <sup>37</sup> | 1 | T | Primary Producer    | 3  | 2  | 1.00  |
| Redondo-Brenes & Montagini 2006 <sup>37</sup> | 2 | T | Primary Producer    | 3  | 2  | 1.00  |
| Redondo-Brenes & Montagini 2006 <sup>37</sup> | 3 | T | Primary Producer    | 3  | 2  | 1.00  |
| Ritchie & Tilman 1993 <sup>38</sup>           | 1 | T | Herbivore           | 3  | 2  | -0.43 |
| Ritchie & Tilman 1993 <sup>38</sup>           | 2 | T | Herbivore           | 3  | 2  | -0.33 |
| Rixen & Mulder 2005 <sup>39</sup>             | 1 | T | Primary Producer    | 8  | 4  | 0.00  |
| Rixen & Mulder 2005 <sup>39</sup>             | 2 | T | Primary Producer    | 8  | 4  | -0.19 |
| Rixen & Mulder 2005 <sup>39</sup>             | 3 | T | Primary Producer    | 8  | 4  | 0.15  |
| Rixen & Mulder 2005 <sup>39</sup>             | 4 | T | Primary Producer    | 8  | 4  | -0.02 |
| Sanpera-Calbet et al. 2009 <sup>40</sup>      | 1 | A | Dead organic matter | 3  | 4  | 0.11  |
| Spaekova & Leps 2001 <sup>41</sup>            | 1 | T | Primary Producer    | 6  | 2  | 0.78  |
| Spaekova & Leps 2001 <sup>41</sup>            | 2 | T | Primary Producer    | 6  | 2  | 0.67  |
| Stachowicz et al. 2008 <sup>42</sup>          | 1 | A | Primary Producer    | 4  | 2  | -0.40 |

|                                        |   |   |                  |   |   |       |
|----------------------------------------|---|---|------------------|---|---|-------|
| Sullivan & Zedler 1999 <sup>43</sup>   | 1 | T | Primary Producer | 6 | 5 | -0.03 |
| Sullivan & Zedler 1999 <sup>43</sup>   | 2 | T | Primary Producer | 3 | 5 | -0.07 |
| Sullivan et al. 2007 <sup>44</sup>     | 1 | T | Primary Producer | 6 | 4 | -0.18 |
| Van Peer et al. 2004 <sup>45</sup>     | 1 | T | Primary Producer | 8 | 2 | 0.42  |
| von Felten & Schmid 2008 <sup>46</sup> | 1 | T | Primary Producer | 4 | 2 | 0.11  |
| Wardle et al. 2003 <sup>2</sup>        | 1 | T | Primary Producer | 9 | 8 | -0.01 |
| Wojdak 2005 <sup>47</sup>              | 1 | A | Herbivore        | 3 | 6 | 0.59  |

30

31 **Supplementary Table 1: A list of all studies used in the analysis.** *Expt* represents independent  
32 experiments conducted within the same study. *System* is either *A* = Aquatic or *T* = Terrestrial. *Max S*  
33 represents the maximum species richness manipulated. *Max F* represents the maximum number of  
34 functions recorded. The average correlation *r* is the mean of all pairwise rank correlations (Kendall's *r*)  
35 among functions in a given experiment.



## Supplementary Note 1: R Code

```
#####  
#  
#           META-ANALYSIS OF BIODIVERSITY AND ECOSYSTEM MULTIFUNCTIONALITY           #  
#  
#####  
  
#Authors: Jon Lefcheck & Jarrett Byrnes  
  
#Last updated: 2015-01-27  
  
#####  
#                               TABLE OF CONTENTS                               #  
#   Line 23: Required libraries                                               #  
#   Line 32: Importing and formatting the data                               #  
#   Line 74: Data exploration                                                 #  
#   Line 179: Multiple threshold approach                                    #  
#   Line 554: Turnover approach                                              #  
#   Line 1198: Averaging approach                                            #  
#   Line 1247: Multiplicative approach                                       #  
#  
#####  
  
library(ggplot2) #Calls: ggplot  
library(gridExtra) #Calls: grid.arrange  
library(MASS) #Calls: glmmPQL  
library(nlme) #Calls: lmeControl  
library(plotrix) #Calls: std.error  
library(plyr) #Calls: ddply, rbind.fill  
library(reshape2) #Calls: melt  
  
#####  
#                               IMPORTING AND FORMATTING THE DATA                               #  
#####  
  
#Import from file: Monoculture meta-master ALL DATA.xlsx  
multifunc=read.csv("Lefcheck et al Multifunc Meta.csv")  
  
#Remove the rows where Direction!="Positive" or !="Negative"  
multifunc=droplevels(subset(multifunc,multifunc$Direction=="Positive" | multifunc$Direction=="Negative"))  
  
#Convert all response means, sample sizes, and standard deviations to numeric  
#First, extract names of columns for response means, N, and SD  
Y.colnames=colnames(multifunc)[ grep("Y",colnames(multifunc)) [grep("Y",colnames(multifunc))>=27] ]  
N.colnames=colnames(multifunc)[ grep("N",colnames(multifunc)) [grep("N",colnames(multifunc))>=27] ]  
SD.colnames=colnames(multifunc)[ grep("SD",colnames(multifunc)) [grep("SD",colnames(multifunc))>=27] ]  
#Convert response values to numeric  
multifunc[,c(Y.colnames,N.colnames,SD.colnames)]=apply(multifunc[,c(Y.colnames,N.colnames,SD.colnames)],2,func  
tion(x) as.numeric(as.character(x)) )  
  
#Check recorded number of species (Smax) against actual number of species in maximum polyculture treatment  
#First, retrieve the column name of the last column with actual values  
poly.colnames=apply(multifunc[,Y.colnames],1,function(x) { y=rev(x[is.finite(x)])[1]; names(y)[length(y)] })  
#Use regular expressions to grab the number in the column name and convert them to a numeric vector  
Smax.colnames=as.numeric(gsub("X([0-9]+).*", "\\1", poly.colnames))  
cbind(as.character(multifunc$Reference), Smax.colnames, multifunc$Smax, Smax.colnames==multifunc$Smax)  
  
#Check to see if any experiments report only one function  
byexpt=ddply(multifunc,c("Reference", "Study", "Expt"),nrow)  
byexpt[byexpt$V1==1,c("Reference", "Study", "Expt")]  
  
#If Direction=="Negative", then transform based on Byrnes et al. 2014 MEE:  $x = -x + \max(x)$   
multifunc[,Y.colnames]=ddply(multifunc,1,function(x)  
  if(x$Direction=="Negative") -x[Y.colnames]+max(x[Y.colnames],na.rm=T) else x[Y.colnames] )[, -1]  
  
#If any responses are negative, scale so that they are all >0  
multifunc[,Y.colnames]=ddply(multifunc,1,function(x)  
  if(any(x[Y.colnames]<0,na.rm=T)) x[Y.colnames]+max(abs(x[Y.colnames]),na.rm=T) else x[Y.colnames] )[, -1]  
  
#Create a dataset with values scaled by the maximum value (for averaging approach)  
multifunc.scaled=multifunc  
multifunc.scaled[,SD.colnames]=ddply(multifunc,1,function(x) x[SD.colnames]/max(abs(x[Y.colnames]),na.rm=T)  
  )[, -1]  
multifunc.scaled[,Y.colnames]=ddply(multifunc,1,function(x) x[Y.colnames]/max(abs(x[Y.colnames]),na.rm=T) )[, -  
1]  
  
#####  
#                               DATA EXPLORATION                               #  
#####  
  
#Number of studies  
nrow(ddply(multifunc,"Study",nrow))  
#Number of experiments  
nrow(ddply(multifunc,c("Study", "Expt"),nrow))
```

```

#Total number of functions
nrow(multifunc)
#Number of experiments for each function
table(ddply(multifunc,c("Study","Expt"),nrow)$V1)

#Number of habitats
count(ddply(multifunc,c("Study","Expt","Sys1"),nrow),vars="Sys1")
#Number of trophic levels
count(ddply(multifunc,c("Study","Expt","FTG"),nrow),vars="FTG")
#And both
count(ddply(multifunc,c("Study","Expt","Sys1","FTG"),nrow),vars=c("FTG","Sys1"))

#Level of richness within an experiment
hist(multifunc$Smax)
median(multifunc$Smax)
range(multifunc$Smax)
#Level of richness within an experiment by habitat
ddply(multifunc,c("Sys1"),summarize,median=median(Smax))
ddply(multifunc,c("Sys1"),function(x) data.frame(min=range(x$Smax)[1],max=range(x$Smax)[2]))
#Level of richness within an experiment by trophic level
ddply(multifunc,c("FTG"),summarize,median=median(Smax))
ddply(multifunc,c("FTG"),function(x) data.frame(min=range(x$Smax)[1],max=range(x$Smax)[2]))

#Number of functions per experiment
median(ddply(multifunc,c("Study","Expt"),nrow)$V1)
range(ddply(multifunc,c("Study","Expt"),nrow)$V1)
#Number of functions per experiment by habitat
ddply(ddply(multifunc,c("Study","Expt","Sys1"),nrow),"Sys1",function(x) data.frame(median=median(x$V1)))
ddply(ddply(multifunc,c("Study","Expt","Sys1"),nrow),"Sys1",function(x)
data.frame(min=range(x$V1)[1],max=range(x$V1)[2]))
#Number of functions per experiment by trophic level
ddply(ddply(multifunc,c("Study","Expt","FTG"),nrow),"FTG",function(x) data.frame(median=median(x$V1)))
ddply(ddply(multifunc,c("Study","Expt","FTG"),nrow),"FTG",function(x)
data.frame(min=range(x$V1)[1],max=range(x$V1)[2]))

#Look at average pairwise correlation between all functions within a study
pairwisecor.df=ddply(multifunc,c("Reference","Study","Expt","Sys1","FTG"),function(x) {
  Smax=unique(x$Smax)
  x=x[,Y.colnames]
  cormat=cor(t(x),use="complete.obs",method=c("kendall"))
  data.frame(
    Smax=Smax,
    no.fn=nrow(x),
    avg.cor=mean(cormat[lower.tri(cormat)]))
}); pairwisecor.df
#And across all studies
mean(pairwisecor.df$avg.cor); std.error(pairwisecor.df$avg.cor)
#By habitat
ddply(pairwisecor.df,"Sys1",summarize,mean(avg.cor),std.error(avg.cor))
#By trophic level
ddply(pairwisecor.df,"FTG",summarize,mean(avg.cor),std.error(avg.cor))
#Plot as a function of number of functions
ggplot(pairwisecor.df,aes(x=no.fn,y=avg.cor))+
  geom_hline(yintercept=0,lwd=0.8,lty=1,col="grey30")+
  geom_point(size=3)+
  scale_x_continuous(breaks=seq(2,12,2))+
  labs(x="Number of functions",y="Average pairwise correlation")+
  theme_bw(base_size=18)+
  theme(panel.grid.major=element_blank(),panel.grid.minor=element_blank())

#Look at number of positive / negative relationships
#First cast data.frame longways
multifunc.long=melt(cbind(multifunc[,c(2:4,6:7,9,12)],multifunc[,Y.colnames]),id.vars=c(1:7),measure.vars=c(8:
12))
multifunc.long$richness=suppressWarnings(
  ifelse(grepl("mono",multifunc.long$variable),1,as.numeric(gsub("X([0-
9]+).*","\\1",multifunc.long$variable)))
)

#Next calculate correlation between richness and functioning for each function
diversitycor.df=ddply(multifunc.long,c("Reference","Study","Expt","Sys1","FTG","Ydesc"),function(x)
  data.frame(cor=cor(x$richness,x$value,use="complete.obs",method="kendall"),
    p.value=cor.test(x$richness,x$value,na.action=na.omit,method="kendall")$p.value)
)

#Calculate number of positive/negative functions for each study
propcor.df=ddply(diversitycor.df,c("Study","Expt","Reference"),function(x)
  cbind(no.fn=length(unique(x$Ydesc)),
    sig.neg=sum(x[x$p.value<=0.05,"cor"]<0),
    sig.pos=sum(x[x$p.value<=0.05,"cor"]>0),
    neutral=length(x[x$p.value>0.05,"cor"]))
)

propcor.df=melt(propcor.df,id.vars=c(1:4),measure.vars=c(5:7))
propcor.df$variable=factor(propcor.df$variable,levels=c("sig.pos","sig.neg","neutral"))
levels(propcor.df$variable)=c("Positive","Negative","Neutral")
#Set symbols based on references in simulation, below
# propcor.df=adply(propcor.df,1,function(x) {
#   if(x$Reference=="Wardle et al. 2003") "diamond" else
#   if(x$Reference=="Cedar Creek (E120)" "triangle" else "none" })
#

#Plot results

```

```

ggplot(propcor.df, aes(x=no.fn, y=value/no.fn, group=variable, col=variable, shape=variable)) + #, shape=V1) +
  geom_point(size=4, alpha=0.5, position="jitter") +
  scale_x_continuous(breaks=c(2, 4, 6, 8, 10, 12)) +
  scale_color_manual(values=c("red", "blue", "grey20"), name="") +
  scale_shape_manual(values=15:17, name="") +
  # scale_shape_manual(values=c(15, 1, 17), guide="none") +
  stat_smooth(method="glm", family=binomial(), aes(lty=variable), lwd=2, se=F) +
  scale_linetype(guide="none") +
  labs(x="Total number of functions", y="Proportion of total functions") +
  theme_bw(base_size=18) +
  theme(panel.grid.major=element_blank(), panel.grid.minor=element_blank(),
        legend.direction="horizontal", legend.position="bottom")

#####
# MULTIPLE THRESHOLD APPROACH
#####

#Create vector of thresholds from 1-99%
thresholds=(1:99)/100

#Loop through thresholds and studies to calculate number of treatments > threshold
thresholds.df=ldply(thresholds, .progress="text", function(thresh) {
  ddply(multifunc, c("Reference", "Study", "Expt"), function(x) {
    #Melt response values and relevant metadata
    responses=melt(cbind(x[,c(2:4, 6:7, 9, 12)], x[,Y.colnames]), id.vars=c(1:7), measure.vars=c(8:112))
    #Remove NA values
    #responses=responses[!is.na(responses$value), ]
    #Create a column for richness
    responses$richness=suppressWarnings(
      ifelse(grepl("mono", responses$variable), 1, as.numeric(gsub("X{[0-9]+}.*", "\\1", responses$variable))) )
    #Determine whether each response for each functions >= some percentage (threshold) of maximum
    responses=ddply(responses, "Ydesc", function(y) cbind(y, greater.than=y$value>=thresh*max(y$value, na.rm=T)) )
    #Summarize for each treatment
    ddply(responses, c("Study", "Expt", "Reference", "Sys1", "FTG", "variable", "richness"), function(z) {
      data.frame(
        threshold=thresh,
        no.fn=length(z$greater.than),
        no.fn.greater=sum(z$greater.than),
        prop.fn.greater=sum(z$greater.than)/length(z$greater.than) ) ) ) ) ) )

#####

#Use mixed models to look at trends generally across all studies by fitting raw counts to
#quasipoisson distribution for each level of threshold
rawmods.list=ddply(thresholds.df, "threshold", .progress="text", function(i) {
  #Set lmeControl for certain thresholds
  if(i$threshold %in% c(0.02, 0.99)) control=lmeControl(opt="optim", msTol=1e-6) else
    control=lmeControl(opt="optim")
  #Function to run models
  f=function(x) glmmPQL(no.fn.greater~richness*no.fn, random=~richness|Study,
    family=quasipoisson(link="identity"), start=c(0.15, 0.05, 0.1, 0.001),
    control=control,
    verbose=F, data=x)
  #Run model, return NA if model fails
  safef=failwith(NA, f)
  safef(i)
})

#Extract predicted fit for muscle plot
#Modified from: http://glmm.wikidot.com/faq
predictraw.df=ldply(1:99, .progress="text", function(i) {
  ldply(2:12, function(j) {
    #Create dataframe for predicted values only for richness
    newdata=expand.grid(
      threshold=i/100,
      richness=1:max(subset(thresholds.df, no.fn==j) [!is.na(subset(thresholds.df, no.fn==j)$no.fn.greater), "richness"]
    ),
    no.fn=j,
    no.fn.greater=NA)
    if(!"glmmPQL" %in% class(rawmods.list[[i]])) {
      return(newdata)
    } else {
      #Generate predicted values from model
      newdata$no.fn.greater=predict(rawmods.list[[i]], newdata, type="response", level=0)
      #Return newdata
      return(newdata)
    }
  })
})

#Remove predictions that exceed the number of functions measured or drop below zero
predictraw.sub.df=ddply(predictraw.df, "no.fn", function(x) {
  x=subset(x, no.fn.greater<=x$no.fn & no.fn.greater>=0)
  data.frame(
    threshold=x$threshold,
    richness=x$richness,
    no.fn=x$no.fn,
    no.fn.greater=x$no.fn.greater)
})

```

```

predictraw.sub.df=ddply(predictraw.df,"no.fn",function(x) subset(x,no.fn.greater<=no.fn))

#Plot predicted values against richness
ggplot(predictraw.sub.df,aes(x=richness,y=no.fn.greater,color=threshold,group=threshold))+
  geom_line(lwd=1,alpha=0.6)+
  geom_hline(aes(yintercept=no.fn),lwd=1,alpha=0.6,ltty=1)+
  scale_color_gradientn(colours=rev(rainbow(5)),name="Threshold")+
  labs(x="Richness",y="Number of functions > threshold")+
  facet_wrap(~no.fn,scales="free",nrow=4)+
  theme_bw(base_size=18)+
  theme(panel.grid.major=element_blank(),panel.grid.minor=element_blank(),
        legend.position=c(0.8,0.1))

#Break out no.fn=max(no.fn) for Figure 2 panel a
p1=ggplot(subset(predictraw.df,no.fn==12 & no.fn.greater<=12 &
no.fn.greater>=0),aes(x=richness,y=no.fn.greater,color=threshold,group=threshold))+
  #geom_hline(yintercept=1,lwd=0.8,ltty=1,col="grey30")+
  geom_line(lwd=1,alpha=0.6)+
  geom_hline(yintercept=12,lwd=1,alpha=0.6,ltty=1)+
  scale_color_gradientn(colours=rev(rainbow(5)),name="Threshold")+
  labs(x="Richness",y="Number of functions > threshold")+
  scale_x_continuous(breaks=c(1,20,40,60))+
  scale_y_continuous(limits=c(-0.1,14.5),breaks=c(0,4,8,12))+
  annotate("text",x=1,y=Inf,label="a",vjust=1.5,col="black",fontface="bold",size=7)+
  theme_bw(base_size=18)+
  guides(colour=guide_colourbar(title.position="top"))+
  theme(panel.grid.major=element_blank(),panel.grid.minor=element_blank(),legend.background=element_blank(),
        legend.position=c(0.7,0.9),legend.direction="horizontal",legend.box="horizontal"); p1

#Extract coefficients and standard errors
rawcoefs.df=ldply(2:max(thresholds.df$no.fn),.progress="text",function(i) {
  ldply(rawmods.list,function(j) {
    if("glmPQL" %in% class(j)) {
      data.frame(
        no.fn=i,
        Intercept=summary(j)$tTable["(Intercept)","Value"]+i*summary(j)$tTable["no.fn","Value"],
        Intercept.Std.Error=sqrt(
          (summary(j)$tTable["(Intercept)","Std.Error"]^2+summary(j)$tTable["no.fn","Std.Error"]^2+
            2*j$varFix["(Intercept)","no.fn"]) ),
        Estimate=summary(j)$tTable["richness","Value"]+i*summary(j)$tTable["richness:no.fn","Value"],
        #Std.Error=summary(j)$tTable["richness","Std.Error"] )
        Estimate.Std.Error=sqrt(
          (summary(j)$tTable["richness","Std.Error"]^2+summary(j)$tTable["richness:no.fn","Std.Error"]^2+
            2*j$varFix["richness","richness:no.fn"]) ) )
    } else {
      data.frame(no.fn=i,Intercept=NA,Intercept.Std.Error=NA,Estimate=NA,Estimate.Std.Error=NA) }
  } ) } )
#Determine which thresholds are significantly different from zero
rawcoefs.df$sig=ifelse(rawcoefs.df$Estimate>2*rawcoefs.df$Estimate.Std.Error,"sig","not.sig")

#Extract threshold of max diversity effect & max threshold at which diversity has a positive effect
maxeffect.df=ddply(rawcoefs.df,"no.fn",function(x) {
  rbind(
    #Find threshold of maximum diversity effect
    cbind(type="max.div.effect",x[which.max(x$Estimate)],),
    #Find maximum threshold at which diversity has a significant positive effect
    cbind(type="max.threshold",x[rev(which(x$sig=="sig"))][1],) ) )
})

#Rename levels for plotting
#levels(maxeffect.df$type)=c("Threshold of maximum diversity effect","Maximum threshold where diversity effect
> 0")
maxeffect.df$type=factor(maxeffect.df$type,levels=c("max.div.effect","max.threshold"))

#Plot threshold against effect size with 95% confidence intervals
p2=ggplot(rawcoefs.df,aes(x=threshold,y=Estimate,group=no.fn))+
  geom_hline(xintercept=0,lwd=0.8,ltty=1,col="grey70")+
  geom_ribbon(aes(fill=no.fn,ymax=Estimate+2*Estimate.Std.Error,ymin=Estimate-
2*Estimate.Std.Error),alpha=0.05)+
  scale_fill_gradientn(high="red",low="blue",name="Number of \nfunctions")+
  geom_line(size=1,aes(col=no.fn))+
  scale_color_gradientn(high="red",low="blue",name="Number of \nfunctions")+
  labs(x="Threshold",y="Diversity effect (Linear coefficients)")+
  geom_point(data=subset(maxeffect.df,no.fn %in% c(2,12)),
            aes(x=threshold,y=Estimate,shape=as.factor(threshold),fill=no.fn,col="white",size=8,width=2))+
  scale_shape_manual(values=c(21:24),guide=F)+
  annotate("text",x=0.01,y=Inf,label="b",vjust=1.5,col="black",fontface="bold",size=7)+
  theme_bw(base_size=18)+
  #guides(colour=guide_colourbar(title.position="top"))+
  theme(panel.grid.major=element_blank(),panel.grid.minor=element_blank(),
        legend.direction="horizontal",legend.box="horizontal",legend.position=c(0.275,0.1)); p2

#Generate Figure 2
grid.arrange(arrangeGrob(p1,p2,ncol=2,widths=c(1.5,2)))

#Look at how intercept changes as a function of threshold
ggplot(rawcoefs.df,aes(x=threshold,y=Intercept))+
  geom_ribbon(aes(fill=no.fn,ymax=Intercept+2*Intercept.Std.Error,ymin=Intercept-2*Intercept.Std.Error),
            alpha=0.2)+

```

```

scale_fill_gradient(high="red",low="blue",name="Number of\nfunctions")+
geom_line(size=1,aes(col=no.fn))+
scale_color_gradient(high="red",low="blue",name="Number of\nfunctions")+
facet_wrap(~no.fn,scales="free",nrow=2)+
labs(x="\nThreshold",y="Intercept\n")+
theme_bw(base_size=18)+
theme(panel.grid.major=element_blank(),panel.grid.minor=element_blank(),legend.position="none")

#Plot against number of functions
ggplot(maxeffect.df,aes(x=no.fn,y=threshold,group=type,fill=no.fn))+
#Add trend line
geom_line()+
#Scale points by the size of the diversity effect
geom_point(aes(size=Estimate),shape=21)+

#geom_text(data=data.frame(type=c("max.threshold","max.div.effect"),no.fn=c(2.3,2.3),threshold=c(0.935,0.795),
lab=c("d","c")),
# aes(label=lab),size=8,fontface="bold")+
#Break out panels by response
facet_wrap(~type,ncol=1,scales="free_y")+
scale_fill_gradient(high="red",low="blue",name="Number of\nfunctions")+
scale_size(range=c(4,8),name="Effect size")+
labs(x="\nNumber of functions",y="Threshold\n")+
#Specify axis breaks
scale_x_continuous(breaks=c(2,4,6,8,10,12))+
theme_bw(base_size=18)+
theme(panel.grid.major=element_blank(),panel.grid.minor=element_blank(),
strip.background=element_blank(),strip.text=element_blank())

#Break out into separate plots
ggplot(subset(maxeffect.df,type=="max.div.effect"),aes(x=no.fn,y=threshold,fill=no.fn))+
#Add trend line
geom_line()+
#Scale points by the size of the diversity effect
geom_point(aes(size=Estimate),shape=21)+
scale_fill_gradient(high="red",low="blue",name="Number of\nfunctions",guide=F)+
scale_size(range=c(4,8),name="Effect size")+
labs(x="\nNumber of functions",y="Threshold of maximum diversity effect\n")+
#Specify axis breaks
scale_x_continuous(breaks=c(2,4,6,8,10,12))+
theme_bw(base_size=18)+
theme(panel.grid.major=element_blank(),panel.grid.minor=element_blank(),
strip.background=element_blank(),strip.text=element_blank(),
legend.position=c(0.85,0.24))

ggplot(subset(maxeffect.df,type=="max.threshold"),aes(x=no.fn,y=threshold,fill=no.fn))+
#Add trend line
geom_line()+
#Scale points by the size of the diversity effect #Scale points by the size of the diversity effect
geom_point(aes(size=Estimate),shape=21)+
scale_fill_gradient(high="red",low="blue",name="Number of\nfunctions",guide=F)+
scale_size(range=c(4,8),name="Effect size")+
labs(x="\nNumber of functions",y="Threshold at which\ndiversity effect is not significant")+
#Specify axis breaks
scale_x_continuous(breaks=c(2,4,6,8,10,12))+
theme_bw(base_size=18)+
theme(panel.grid.major=element_blank(),panel.grid.minor=element_blank(),
strip.background=element_blank(),strip.text=element_blank(),
legend.position=c(0.85,0.28))

#####

#Extract slopes for each individual experiment from mixed model

#Create dataframe for predicted values for each study
predictindividual.df=ldply(1:99,.progress="text",function(i) {
  ldply(unique(thresholds.df$Study),function(j) {
    #Generate dataframe for predicted values
    newdata=expand.grid(
      Study=j,
      threshold=i/100,
      richness=1:max(subset(thresholds.df,Study==j)[!is.na(subset(thresholds.df,Study==j)$no.fn.greater),"richness"]
    ),
    no.fn=max(subset(thresholds.df,Study==j)$no.fn)
  #Add predicted values with varying slope of richness for each study
  newdata$no.fn.greater=predict(rawmods.list[[i]],newdata,type="response")
  #Return dataframe
  return(newdata)
  } ) } )

#Add column for reference (for panel headers)
predictindividual.df$Reference=multifunc[match(predictindividual.df$Study,multifunc$Study),"Reference"]
#Generate muscle plots
ggplot(predictindividual.df,aes(x=richness,y=no.fn.greater,col=threshold,group=threshold))+
geom_line(lwd=1,alpha=0.6)+
scale_color_gradientn(colours=rev(rainbow(5)),name="Threshold")+
labs(x="\nRichness",y="Number of functions > than threshold\n")+

```

```

facet_wrap(~Reference, scales="free")+
theme_bw(base_size=18)+
theme(panel.grid.major=element_blank(), panel.grid.minor=element_blank(), strip.text.x=element_text(size=12),
       legend.position="right" )

#Extract coefficients for muscle plots
individualcoefs.df=ldply(1:99, .progress="text", function(i) {
  ldply(unique(thresholds.df$Study), function(j) {
    ldply(unique(thresholds.df[thresholds.df$Study==j, "no.fn"]), function(k) {
      data.frame(
        Study=rownames(coef(rawmods.list[[i]])) [j],
        no.fn=k,
        threshold=i/100,
        Intercept=coef(rawmods.list[[i]]) [j,1]+k*coef(rawmods.list[[i]]) [j,3],
        Estimate=coef(rawmods.list[[i]]) [j,2]+k*coef(rawmods.list[[i]]) [j,4] )
    } ) ) } )

#Add column for reference (for panel headers)
individualcoefs.df$Reference=multifunc[match(individualcoefs.df$Study, multifunc$Study), "Reference"]
#Plot coefs against threshold
ggplot(individualcoefs.df, aes(x=threshold, y=Estimate, group=no.fn, col=no.fn)) +
  geom_hline(xintercept=0, lwd=0.8, lty=1, col="grey70") +
  geom_line(lwd=1.2) +
  facet_wrap(~Reference, scales="free", ncol=5) +
  scale_color_gradient(high="red", low="blue", name="Number of\nfunctions") +
  scale_x_continuous(breaks=c(0, 0.5, 1), labels=c("0", "0.5", "1")) +
  labs(x="Threshold", y="Diversity Effect") +
  theme_bw(base_size=18) +
  theme(panel.grid.major=element_blank(), panel.grid.minor=element_blank(),
        strip.text.x=element_text(size=12), strip.background=element_blank(),
        legend.direction="horizontal", legend.position=c(0.55, 0.025))
#Plot intercept against threshold
ggplot(individualcoefs.df, aes(x=threshold, y=Intercept, group=no.fn, col=no.fn)) +
  geom_hline(xintercept=0, lwd=0.8, lty=1, col="grey70") +
  geom_line(lwd=1.2) +
  facet_wrap(~Reference, scales="free") +
  scale_color_gradient(high="red", low="blue", name="Number of\nfunctions") +
  labs(x="\nThreshold", y="Intercept\n") +
  theme_bw(base_size=18) +
  theme(panel.grid.major=element_blank(), panel.grid.minor=element_blank(), strip.text.x=element_text(size=12))

#####

#Explore whether this relationship changes as a function of system or trophic level
thresholds.df$FTG=relevel(thresholds.df$FTG, "Primary Producer")
globalmods.list=dlply(thresholds.df, "threshold", .progress="text", function(i) {
  #Set lmeControl for certain thresholds
  if(i$threshold %in% c(0.46)) control=lmeControl() else
    control=lmeControl(opt="optim", msTol=1e-6)
  #Function to run models
  f=function(x) glmmPQL(no.fn.greater~richness*no.fn+richness*Sys1+richness*FTG, random=~richness|Study,
                       family=quasipoisson(link="identity"),
                       start=c(1, 0.1, 0.5, rep(0, 11)),
                       control=control,
                       verbose=F, data=x)

  safef=failwith(NA, f)
  safef(i)
} )

#Create dataframe for predicted values for each system
predictglobal.df=ldply(1:99, .progress="text", function(i) {
  ldply(unique(thresholds.df$Sys1), function(j) {
    ldply(unique(thresholds.df$FTG), function(k) {
      #Subset dataframe
      data=subset(thresholds.df, Sys1==j & FTG==k)
      data=data[!is.na(data$no.fn.greater), ]
      if("glmmPQL" %in% class(globalmods.list[[i]])) {
        if(nrow(data)==0) {
          data.frame()
        } else {
          #Create new dataframe to store predictions
          newdata=expand.grid(
            Sys1=j,
            FTG=k,
            threshold=i/100,
            richness=1:max(data$richness),
            no.fn=max(data$no.fn)
          )
          #Generate predicted values
          newdata$no.fn.greater=predict(globalmods.list[[i]], newdata, type="response", level=0)
          return(newdata)
        }
      } else {
        data.frame()
      }
    } ) ) } )
} ) ) )

#Plot predicted results by trophic group and system
ggplot(predictglobal.df, aes(x=richness, y=no.fn.greater, col=threshold, group=threshold)) +
  geom_line(lwd=1, alpha=0.6) +
  scale_color_gradientn(colours=rev(rainbow(5)), name="Threshold") +

```



```

theme(panel.grid.major=element_blank(), panel.grid.minor=element_blank(),
      strip.text.x=element_blank(), strip.background=element_blank(),
      legend.background=element_blank(), legend.key=element_blank(),
      legend.direction="horizontal", legend.box="horizontal", legend.position=c(0.2, 0.77))

#Plot intercepts against threshold
ggplot(globalcoefs.df, aes(x=threshold, y=Intercept, col=no.fn, group=no.fn)) +
  geom_hline(xintercept=0, lwd=0.8, lty=1, col="grey70") +
  geom_line(lwd=1.2) +
  scale_color_gradient(high="red", low="blue", name="Number of\nfunctions") +
  facet_grid(Sys1~FTG, scales="free") +
  scale_x_continuous(breaks=c(0, 0.25, 0.5, 0.75, 1)) +
  labs(x="\nThreshold", y="Intercept\n") +
  theme_bw(base_size=18) +
  theme(panel.grid.major=element_blank(), panel.grid.minor=element_blank(),
        strip.text.x=element_text(size=12), legend.position=c(0.075, 0.25) )

#####

#Look at sensitivity of trophic levels results to Smax
#Identify studies with Smax > 6
ref.remove=unique(
  c(as.character(multifunc[multifunc$Smax > 6, "Reference"]),
    as.character(multifunc[!multifunc$FTG %in% c("Primary Producer", "Herbivore"), "Reference"])) )
#Subset thresholds.sub.df to remove all experiments that manipulated Smax > 6
thresholds.sub.df=subset(thresholds.df, !Reference %in% ref.remove)
thresholds.sub.df$FTG=relevel(thresholds.sub.df$FTG, "Primary Producer")
#Re-run GLMMs
globalmods.sub.list=dply(thresholds.sub.df, "threshold", .progress="text", function(i) {
  #Function to run models
  f=function(x) glmmPQL(no.fn.greater~richness*no.fn+richness*Sys1+richness*FTG, random=~richness|Study,
    family=quasipoisson(link="identity"),
    start=c(1, 0.1, 0.5, rep(0, 5)),
    control=lmeControl(opt="optim", msTol=1e-4),
    verbose=F, data=x)

  safef=failwith(NA, f)
  safef(i)
})

#Extract coefficients for muscle plots
globalcoefs.sub.df=ldply(1:99, .progress="text", function(i) {
  ldply(unique(thresholds.sub.df$Sys1), function(k) {
    ldply(unique(thresholds.sub.df$FTG), function(l) {
      data=subset(thresholds.sub.df, Sys1==k & FTG==l)
      if(nrow(data)==0) data.frame() else {
        ldply(2:max(data$no.fn), function(j) {
          if("glmmPQL" %in% class(globalmods.sub.list[[i]])) {
            mod=globalmods.sub.list[[i]]
            data.frame(
              threshold=i/100,
              Sys1=k,
              FTG=l,
              no.fn=j,
              Intercept=
                summary(mod)$tTable["Intercept", "Value"] +
                ifelse(k=="Aquatic", 0, summary(mod)$tTable[paste("Sys1", k, sep=""), "Value"]) +
                ifelse(l=="Primary Producer", 0, summary(mod)$tTable[paste("FTG", l, sep=""), "Value"]) +
                j*summary(mod)$tTable["no.fn", "Value"],
              Estimate=
                summary(mod)$tTable["richness", "Value"] +
                ifelse(k=="Aquatic", 0, summary(mod)$tTable[paste("richness:Sys1", k, sep=""), "Value"]) +
                ifelse(l=="Primary Producer", 0, summary(mod)$tTable[paste("richness:FTG", l, sep=""), "Value"]) +
                j*summary(mod)$tTable["richness:no.fn", "Value"] )
          } else {
            data.frame() } }
        } ) } } ) } )

#Plot coefs against threshold (subset out max number of functions): 9" x 5"
ggplot(
  data=ddply(subset(globalcoefs.sub.df, FTG %in% c("Primary Producer", "Herbivore")), c("Sys1", "FTG"), function(x)
  subset(x, no.fn==max(no.fn))),
  aes(x=threshold, y=Estimate, col=Sys1, group=Sys1)) +
  geom_rect(data=data.frame(
    FTG=levels(globalcoefs.sub.df$FTG)[c(1, 5)],
    Sys1=rep(levels(globalcoefs.sub.df$Sys1), each=4),
    threshold=0, Estimate=0),
    aes(fill=FTG, xmin=-Inf, xmax=Inf, ymin=-Inf, ymax=Inf, alpha=0.15, show_guide=F) +
  scale_fill_manual(values=c("deepskyblue3", "forestgreen"), guide="none") +
  geom_hline(xintercept=0, lwd=0.8, lty=1, col="grey30") +
  geom_line(lwd=1) + #aes(lty=Sys1, lwd=1) +
  #scale_linetype_manual(values=c(1, 6)) +
  scale_color_manual(values=c("blue2", "darkgreen"), guide=guide_legend(ncol=1), name="") +
  facet_grid(~FTG, scales="free", space="free") +
  scale_x_continuous(breaks=c(0, 0.5, 1), labels=c("0", "0.5", "1")) +
  geom_text(data=data.frame(
    FTG=levels(globalcoefs.sub.df$FTG)[c(1, 5)],
    Sys1=rep(levels(globalcoefs.sub.df$Sys1), each=4),

```



```

labels=letters[1:2]),
aes(x=0.1,y=Inf,label=labels),vjust=1.5,col="black",fontface="bold",size=6)+
geom_text(data=data.frame(
  FTG=levels(globalcoefs.sub.df$FTG)[c(1,5)],
  Sys1=rep(levels(globalcoefs.sub.df$Sys1),each=4)),
aes(x=0.15,y=-0.2,label=FTG),vjust=0,hjust=0,col="black",size=5)+
labs(x="Threshold",y="Diversity Effect")+
theme_bw(base_size=18)+
theme(panel.grid.major=element_blank(),panel.grid.minor=element_blank(),
strip.text.x=element_blank(),strip.background=element_blank(),
legend.background=element_blank(),legend.key=element_blank(),
legend.direction="horizontal",legend.box="horizontal",legend.position=c(0.12,0.77))

#####

#Simulations to explore the dip in diversity effect around 50% threshold for high numbers of functions
#Extract data for studies that exhibit the dip for further simulations
cedarcreek.df=subset(multifunc.long,Reference=="Cedar Creek (E120)" & value!="NA")
wardle.df=subset(multifunc.long,Reference=="Wardle et al. 2003" & value!="NA")

sim.df=ldply(1:100,.progress="text",function(rep) {
  ldply(seq(0,1,0.1),function(i) { #Percent of negative functions
    ldply(list(cedarcreek.df,wardle.df),function(j) {
      #Specify number of functions
      no.fn=length(unique(j$Ydesc))
      #Specify diversity levels
      divlevels=j[j$Ydesc %in% unique(j$Ydesc)[1],"richness"]
      #Construct data.frame with appropriate dims
      newdf=cbind(
        data.frame(diversity=divlevels),
        matrix(rep(NA,length(divlevels)*no.fn),nrow=length(divlevels)) )
      #Populate with values
      newdf[,2:ncol(newdf)]=colwise(function(x) rnorm(nrow(newdf),newdf$diversity,1))(newdf[,2:ncol(newdf)])
      #Define % of functions that have a negative relationship with diversity
      negcol=round(no.fn*i)
      #Convert that number in newdf to negative
      if(negcol>0) newdf[,2:(negcol+1)]=-newdf[,2:(negcol+1)]+max(newdf[,2:(negcol+1)]) else newdf=newdf
      #Scale response
      #newdf[,2:ncol(newdf)]=colwise(function(x) x/max(x))(newdf[,2:ncol(newdf)])
      #Generate threshold data
      thresh.df=ldply(1:99/100,function(k)
        cbind(
          diversity=newdf[,1],
          thresh=k,
          no.fn.greater=rowSums(colwise(function(x) x>=max(x)*k)(newdf[,2:ncol(newdf)])) ) )
      #Get linear slopes
      ddply(thresh.df,"thresh",function(x) {
        mod=try(glm(no.fn.greater~diversity,data=x,family=quasipoisson(link="identity"),start=c(0,0.1)))
        if(class(mod) == "try-error")
          cbind(
            rep=rep,
            Reference=as.character(unique(j$Reference)),
            pneg=i,
            no.fn=no.fn,
            thresh=unique(x$thresh),
            Estimate=NA,
            Std.Error=NA,
            N=NA) else
            cbind(
              rep=rep,
              Reference=as.character(unique(j$Reference)),
              pneg=i,
              no.fn=no.fn,
              thresh=unique(x$thresh),
              Estimate=summary(mod)$coefficients["diversity",1],
              Std.Error=summary(mod)$coefficients["diversity",2],
              n=mod$df.residuals) ) )
      } )
    } )
  } )
) )

sim.df[,3:7]=apply(sim.df[,3:7],2,function(x) as.numeric(x))

#Summarize for plotting
sim.df.summary=ddply(sim.df,c("Reference","pneg","no.fn","thresh"),function(x)
  data.frame(
    Reference=unique(x$Reference),
    pneg=unique(x$pneg),
    no.fn=unique(x$no.fn),
    thresh=unique(x$thresh),
    Estimate=mean(x$Estimate),
    Std.Error=std.error(x$Estimate)) )
# Std.Error=sqrt(sum(x$Std.Error/x$n)) ) )

#Graph results
ggplot(sim.df,aes(x=thresh,y=Estimate,group=rep))+
  geom_hline(yintercept=0,col="grey50",lwd=0.5)+
  # geom_ribbon(aes(ymin=Estimate-Std.Error,ymax=Estimate+Std.Error),col="blue")+

```

```

geom_line(lwd=0.3,alpha=0.7)+
scale_x_continuous(breaks=c(0,0.5,1),labels=c("0","0.5","1"))+
#scale_color_gradient(high="green",low="firebrick1",name="Number of\nfunctions")+
facet_grid(Reference~pneg,scales="free")+
labs(x="Threshold",y="Diversity effect")+
theme_bw(base_size=18)+
theme(panel.grid.major=element_blank(),panel.grid.minor=element_blank())

#####

#Conduct sensitivity analysis by removing each study individually, and re-generating coef plot
rawmods.sensitivity.df=ldply(c("0.2","0.4","0.6","0.8"),function(i) {
  ldply(unique(thresholds.df$Study),.progress="text",function(j) {
    #Subset data
    data=subset(thresholds.df,Study!=j & threshold==i)
    #Function to run models
    f=function(x) glmmPQL(no.fn.greater~richness*no.fn.random=~richness|Study,
                        family=quasipoisson(link="identity"),start=c(0.15,0.05,0.1,0.001),
                        control=lmeControl(opt="optim",msTol=1e-4),
                        verbose=F,data=x)
    #Run model, return NA if model fails
    safef=failwith(NA,f)
    mod=safef(data)
    #Extract coefficient and standard error and return in data.frame
    if(is.na(mod)) data.frame(Study.removed=j,threshold=i,coef=NA,coef.se=NA) else
      data.frame(
        Study.removed=j,
        threshold=i,
        coef=summary(mod)$tTable[2,1],
        coef.se=summary(mod)$tTable[2,2] )
  } )
})

rawmods.sensitivity.df$Ref.removed=thresholds.df[match(rawmods.sensitivity.df$Study,thresholds.df$Study),"Reference"]
rawmods.sensitivity.df$threshold=factor(rawmods.sensitivity.df$threshold)
levels(rawmods.sensitivity.df$threshold)=c("20%","40%","60%","80%")

#Plot results: 12" x 8"
ggplot(rawmods.sensitivity.df,aes(y=coef,x=Ref.removed,col=Ref.removed))+
  geom_hline(data=data.frame(
    threshold=c("20%","40%","60%","80%"),
    coef=c(summary(rawmods.list[[20]])$tTable[2,1],
           summary(rawmods.list[[40]])$tTable[2,1],
           summary(rawmods.list[[60]])$tTable[2,1],
           summary(rawmods.list[[80]])$tTable[2,1] ) ,
    aes(yintercept=coef),lwd=1,alpha=0.6,ltty=1)+
  geom_point(size=3)+
  geom_errorbar(aes(ymax=coef+2*coef.se,ymin=coef-2*coef.se))+
  coord_flip()+
  facet_wrap(~threshold,nrow=1)+
  labs(y="Regression coefficient",x="Study removed")+
  theme_bw(base_size=12)+
  theme(legend.position="none",panel.grid.major=element_blank(),panel.grid.minor=element_blank())

#####
#
# TURNOVER APPROACH
#
#####

#First, extract only mono data for each experiment and store in a list
mono.list=ldply(multifunc,c("Reference","Study","Expt","Smax","Sys1","FTG"),function(i) {
  #Get monocultures and metadata
  monos=i[,c(2:4,9,grep("mono",colnames(i)))]
  #Melt monos dataframe
  monos.melt=melt(monos,id.vars=c(1:4),measures.vars=c(5:ncol(monos)))
  #Split columns based on response (Y, N, SD, or ID)
  monos.melt=cbind(monos.melt[1:4],
                  t(matrix(unlist(strsplit(gsub("[0-9]+","\\1-",monos.melt$variable),"~"),nrow=2)),
                    value=monos.melt[, "value"]))
  names(monos.melt)[5:6]=c("treatment","variable")
  #Cast variables
  monos.cast=dcast(monos.melt,Study+Expt+Reference+Ydesc+treatment~variable,value.var="value")
  #Remove rows where Y=NA
  monos.cast=monos.cast[!is.na(monos.cast$Y),]
  #Convert responses to numeric
  monos.cast[,c("Y","SD","N")]=apply(monos.cast[,c("Y","SD","N")],2,as.numeric)
  #Return dataframe
  return(monos.cast)
})

#Determine the most extreme species for each function, then sum the number of unique most extreme species
#across all functions within an experiment
extremesp.df=ldply(mono.list,function(i) {
  data.frame(no.sp=length(unique(i$treatment)),no.fn=length(unique(i$Ydesc)),
             no.max.sp=length(unique(ddply(i,"Ydesc",function(x) x[which.max(x$Y),"ID"])$V1)),
             no.min.sp=length(unique(ddply(i,"Ydesc",function(x) x[which.min(x$Y),"ID"])$V1)) ) )
})

#Mean turnover in extreme species across all functions measured within an experiment

```

```

mean(extremesp.df$no.max.sp/extremesp.df$no.fn); std.error(extremesp.df$no.max.sp/extremesp.df$no.fn);
range(extremesp.df$no.max.sp/extremesp.df$no.fn)
mean(extremesp.df$no.min.sp/extremesp.df$no.fn); std.error(extremesp.df$no.min.sp/extremesp.df$no.fn);
range(extremesp.df$no.min.sp/extremesp.df$no.fn)

#Parse by system and trophic level
ddply(extremesp.df,"Sys1",function(x) data.frame(
  max.effect.size=mean(x$no.max.sp/x$no.fn),
  max.std.error=std.error(x$no.max.sp/x$no.fn),
  min.effect.size=mean(x$no.min.sp/x$no.fn),
  min.std.error=std.error(x$no.min.sp/x$no.fn) ) )

ddply(extremesp.df,"FTG",function(x) data.frame(
  max.effect.size=mean(x$no.max.sp/x$no.fn),
  max.std.error=std.error(x$no.max.sp/x$no.fn),
  min.effect.size=mean(x$no.min.sp/x$no.fn),
  min.std.error=std.error(x$no.min.sp/x$no.fn) ) )

#####
# AVERAGING APPROACH
#####

#Calculate average level of functioning across all functions for each treatment, for each experiment
multifunc.avg=ddply(multifunc.scaled,c("Reference","Study","Expt","FTG","Sys1","Sys2"),function(x) {
  z=data.frame(
    richness=colnames(x[,Y.colnames]),
    no.fn=length(unique(x$Ydesc)),
    avg.fn=colMeans(x[,Y.colnames]),
    avg.fn.SD=sqrt(
      colSums((x[,N.colnames]-1)*(x[,SD.colnames]^2),na.rm=T)/
      (colSums(x[,N.colnames],na.rm=T)-nrow(x[,N.colnames])) ),
    avg.fn.N=colSums(x[,N.colnames]) )
  #Remove rows where there is no response (i.e., avg.fn==NA)
  z=z[!is.na(z$avg.fn),]
  #Set richness by splitting column names
  z$richness=suppressWarnings(ifelse(grepl("mono",z$richness),1,as.numeric(gsub("X{[0-9]+}.*","\\1",z$richness))))
  return(z) } )

#Investigate proper functional form to use
#Group data for random effects
multifunc.avg.grouped=groupedData(avg.fn~richness|Study,data=multifunc.avg)
#Fit different functional forms using non-linear mixed models
Null=nlme(avg.fn~a,fixed=a~1,random=~a~1,start=c(a=0.2),data=multifunc.avg.grouped)
Linear=nlme(avg.fn~a+b*richness,fixed=a+b~1,random=~a+b~1,start=c(a=1.5,b=1),data=multifunc.avg.grouped)
Logarithmic=nlme(avg.fn~a+b*log(richness),fixed=a+b~1,random=~a+b~1,start=c(a=1,b=1),data=multifunc.avg.grouped)
Power=nlme(avg.fn~a*richness^b,fixed=a+b~1,random=~a+b~1,start=c(a=0.2,b=2),data=multifunc.avg.grouped)
Saturating=nlme(avg.fn~richness/(k+richness),fixed=k~1,random=k~1,start=c(k=1),data=multifunc.avg.grouped)
#Compare models using AIC
AIC(Null,Linear,Logarithmic,Power,Saturating)

#Fit log relationship using linear mixed effects model, allowing slopes and intercepts to vary by Study
avgmods.list=lapply(c("unweighted","variance","sample.size"),function(i) {
  #Subset dataset to include only non-NA data points for each type of analysis
  if(i=="variance") { multifunc.avg=multifunc.avg[!is.na(multifunc.avg$avg.fn.SD),]
  } else if(i=="sample.size") { multifunc.avg=multifunc.avg[!is.na(multifunc.avg$avg.fn.N),]
  } else { multifunc.avg }
  #Fit linear mixed effects model for each weighting scheme
  if(i=="unweighted") {
    mod=glmmPQL(avg.fn~log(richness),random=~richness|Study,family=quasibinomial(link="identity"),
      start=c(0.5,0),data=multifunc.avg,verbose=F)
  } else if(i=="variance") {
    mod=glmmPQL(avg.fn~log(richness),random=~richness|Study,weights=1/((multifunc.avg$avg.fn.SD^2)+0.01),
      family=quasibinomial(link="identity"),start=c(0.5,0),data=multifunc.avg,verbose=F)
  } else {
    mod=glmmPQL(avg.fn~log(richness),random=~richness|Study,weights=sqrt(multifunc.avg$avg.fn.N),
      family=quasibinomial(link="identity"),start=c(0.5,0),data=multifunc.avg,verbose=F) }
  #Return model
  return(mod)
} )
#Append reduced model (S <= 16)
avgmods.list=append(avgmods.list,list(update(avgmods.list[[1]],data=subset(multifunc.avg,richness<=16))) )
#Look at output and diagnostic plots
lapply(avgmods.list,summary); lapply(avgmods.list,plot)

#Extract predicted fits for plot
pred.df.list=lapply(seq_along(avgmods.list),function(i) {
  if(i<4) multifunc.avg=multifunc.avg else multifunc.avg=subset(multifunc.avg,!paste(Study,Expt) %in%
unique(paste(subset(multifunc.avg,richness>16)$Study,subset(multifunc.avg,richness>16)$Expt)))
#Modified from: http://glmm.wikidot.com/faq
#Create dataframe for predicted values for overall fit
newdata=expand.grid(richness=1:max(multifunc.avg$richness),no.fn=2:max(multifunc.avg$no.fn),avg.fn=0)
#Generate predicted values for overall trend
newdata$avg.fn=predict(avgmods.list[[i]],newdata,type="response",level=0)
#Obtain model matrix
mm=model.matrix(terms(avgmods.list[[i]]),newdata)

```

```

#Obtain estimate of SE based on fixed effects only
newdata$fixedSE=sqrt(diag(mm %*% tcrossprod(vcov(avgmods.list[[i]]),mm)))

#Create dataframe for predicted values for each study
newdata2=ldply(unique(multifunc.avg$Study),function(j)
  data.frame(Study=j,
    richness=1:max(subset(multifunc.avg,Study==j)$richness),
    no.fn=max(subset(multifunc.avg,Study==j)$no.fn) ) )
#Generate predicted values for each study
newdata2$avg.fn=predict(avgmods.list[[i]],newdata2,type="response",level=1)

#Return dataframes in a list
list(newdata,newdata2)
) )

#Plot predicted values and confidence bands across all studies on top of fitted values for each individual
study
avgplots.list=lapply(1:3,function(i) {
  ggplot()+
    #Plot raw points
    geom_point(data=multifunc.avg,aes(x=richness,y=avg.fn),size=2,col="grey60",alpha=0.5)+
    #Plot curves for each study
    geom_line(data=pred.df.list[[i]][[2]],aes(x=richness,y=avg.fn,group=Study),col="black",lwd=0.8,alpha=0.7)+
    #Add confidence band for mixed model predictions based on fixed effects only
    geom_ribbon(data=pred.df.list[[i]][[1]],
      aes(x=richness,y=avg.fn,ymax=avg.fn+2*fixedSE,ymin=avg.fn-2*fixedSE),
      fill="red",alpha=0.4)+
    #Add line for mixed model predictions
    geom_line(data=pred.df.list[[i]][[1]],aes(x=richness,y=avg.fn),col="red",lwd=1.5,alpha=0.9)+
    scale_x_continuous(breaks=c(1,20,40,60))+
    scale_y_continuous(limits=c(0,1.1),breaks=c(0,0.5,1))+
    labs(x="Richness",y="Average multifunctionality")+
    theme_bw(base_size=18)+
    theme(panel.grid.major=element_blank(),panel.grid.minor=element_blank())
} )#; avgplots.list

#Plot figure 1 with inset from list above (5 x 4.5")
p1=ggplot(data=subset(multifunc.avg,!paste(Study,Expt) %in%
unique(paste(subset(multifunc.avg,richness>16)$Study,subset(multifunc.avg,richness>16)$Expt))),
  aes(x=richness,y=avg.fn))+
  #Plot raw points
  geom_point(size=2.5,col="grey60",alpha=0.3)+
  #Plot curves for each study
  geom_line(data=pred.df.list[[4]][[2]],aes(x=richness,y=avg.fn,group=Study),col="grey20",lwd=0.75,alpha=0.8)+
  #Add confidence band for mixed model predictions based on fixed effects only
  geom_ribbon(data=pred.df.list[[4]][[1]],
    aes(x=richness,y=avg.fn,ymax=avg.fn+2*fixedSE,ymin=avg.fn-2*fixedSE),
    fill="red",alpha=0.4)+
  #Add line for mixed model predictions
  geom_line(data=pred.df.list[[4]][[1]],aes(x=richness,y=avg.fn),col="red",lwd=2.5)+
  coord_cartesian(ylim=c(-0.05,1.1))+
  scale_x_continuous(breaks=c(1,4,8,12,16),labels=c("1","4","8","12","16"))+
  scale_y_continuous(breaks=seq(0,1,0.2))+
  labs(x="Richness",y="Average multifunctionality")+
  geom_text(data=data.frame(
    labels=letters[1]),
    aes(x=-Inf,y=Inf,label=labels),vjust=1.5,hjust=-1.5,col="black",fontface="bold",size=9)+
  theme_bw(base_size=18)+
  theme(panel.grid.major=element_blank(),panel.grid.minor=element_blank())+
annotation_custom(grob=ggplotGrob(avgplots.list[[1]]+labs(x="",y="")+theme(plot.margin=unit(c(0,0,0,0),"cm"))),
  xmin=7,xmax=16,ymin=-0.075,ymax=0.385)

#####

#Look at diversity effects on single functions
#Rearrange scaled responses so they are in the same format as the averaged dataset
multifunc.single=data.frame(
  melt(multifunc.scaled,
    id.vars=c("Reference","Study","Expt","FTG","Sys1","Sys2","Ydesc"),
    measure.vars=c(Y.colnames)),
  fn.N=melt(multifunc.scaled,
    id.vars=c("Reference","Study","Expt","FTG","Sys1","Sys2","Ydesc"),
    measure.vars=c(N.colnames))[9],
  fn.SD=melt(multifunc.scaled,
    id.vars=c("Reference","Study","Expt","FTG","Sys1","Sys2","Ydesc"),
    measure.vars=c(SD.colnames))[9] )
names(multifunc.single)[9:11]=c("fn.mean","fn.N","fn.SD")
multifunc.single=multifunc.single[!is.na(multifunc.single$fn.mean),]
multifunc.single$richness=
  suppressWarnings(ifelse(grepl("mono",multifunc.single$variable),1,as.numeric(gsub("X([0-
9]+).*","\\1",multifunc.single$variable))))

#Fit linear mixed effects model allowing slopes and intercepts to vary by Study
singlemods.list=lapply(c("unweighted","variance"),function(i) { #,"sample.size"),function(i) {
  #Subset dataset to include only non-NA data points for each type of analysis

```

```

if(i=="variance") { multifunc.single=multifunc.single[!is.na(multifunc.single$fn.SD),]
} else if(i=="sample.size") { multifunc.single=multifunc.single[!is.na(multifunc.single$fn.N),]
} else { multifunc.single }
#Fit linear mixed effects model for each weighting scheme
if(i=="unweighted") {
  mod=glmmPQL(fn.mean~log(richness), random=~richness|Study/Ydesc, family=quasibinomial(link="identity"),
  start=c(0.5,0), control=lmeControl(msTol=1e-5, opt="optim"), data=multifunc.single, verbose=F)
} else if(i=="variance") {

mod=glmmPQL(fn.mean~log(richness), random=~richness|Study/Ydesc, weights=1/(multifunc.single$fn.SD^2)+0.01),
  family=quasibinomial(link="identity"), start=c(0.5,0), control=lmeControl(msTol=1e-
5, opt="optim"), data=multifunc.single, verbose=F)
} else {
  mod=glmmPQL(fn.mean~log(richness), random=~richness|Study/Ydesc, weights=sqrt(multifunc.single$fn.N),
  family=quasibinomial(link="identity"), start=c(0.2,0), control=lmeControl(msTol=1e-
5, opt="optim"), data=multifunc.single, verbose=F)
}
#Return model
return(mod)
} )
#Look at output and diagnostic plots
lapply(singlemods.list, summary); lapply(singlemods.list, plot)

#Extract predicted fits for plot
singlepred.df.list=lapply(seq_along(singlemods.list), function(i) {
#Modified from: http://glmm.wikidot.com/faq
#Create dataframe for predicted values for overall fit
newdata=expand.grid(richness=1:max(multifunc.single$richness),
  fn.mean=0)
#Generate predicted values for overall trend
newdata$fn.mean=predict(singlemods.list[[i]], newdata, type="response", level=0)
#Obtain model matrix
mm=model.matrix(terms(singlemods.list[[i]]), newdata)
#Obtain estimate of SE based on fixed effects only
newdata$fixedSE=sqrt(diag(mm %*% tcrossprod(vcov(singlemods.list[[i]]), mm)))

#Create dataframe for predicted values for each study
newdata2=ldply(unique(multifunc.single$Study), function(j) {
  ldply(unique(subset(multifunc.single, Study==j)$Expt), function(k) {
    expand.grid(Study=j, Expt=k,
      Ydesc=unique(subset(multifunc.single, Study==j)$Ydesc),
      richness=1:max(subset(multifunc.single, Study==j)$richness)) } ) } )
#Generate predicted values for each study
newdata2$fn.mean=predict(singlemods.list[[i]], newdata2, type="response", level=2)
newdata2$Ydesc=paste(newdata2$Ydesc, newdata2$Study, newdata2$Expt, sep=".")

#Return dataframes in a list
list(newdata, newdata2)
} )

#Plot predicted values and confidence bands across all studies on top of fitted values for each individual
study
singleplots.list=lapply(1:2, function(i) {
  ggplot()+
  #Plot raw points
  #geom_point(data=multifunc.single, aes(x=richness, y=fn.mean), size=2, col="grey60", alpha=0.5)+
  #Plot curves for each function
  # geom_line(data=singlepred.df.list[[i]][[2]], aes(x=richness, y=fn.mean, group=Ydesc),
  # alpha=0.3, lwd=0.8)+
  #Add confidence band for mixed model predictions based on fixed effects only
  geom_ribbon(data=singlepred.df.list[[i]][[1]],
    aes(x=richness, y=fn.mean, ymax=fn.mean+2*fixedSE, ymin=fn.mean-2*fixedSE),
    fill="red", alpha=0.3)+
  #Add line for mixed model predictions
  geom_line(data=singlepred.df.list[[i]][[1]], aes(x=richness, y=fn.mean), col="red", lwd=1.5, alpha=0.9)+
  scale_y_continuous(limits=c(0, 1.1), breaks=seq(0, 1, 0.2))+
  labs(x="Richness", y="Functioning (single functions pooled)")+
  theme_bw(base_size=18)+
  theme(panel.grid.major=element_blank(), panel.grid.minor=element_blank())
} )

#Plot with average multifunctionality
p2=ggplot()+
  geom_point(data=multifunc.single, aes(x=richness, y=fn.mean), size=2, col="grey60", alpha=0.5)+
  # geom_ribbon(data=pred.df.list[[1]][[1]],
  # aes(x=richness, y=avg.fn, ymax=avg.fn+2*fixedSE, ymin=avg.fn-2*fixedSE),
  # fill="red", alpha=0.4)+
  geom_ribbon(data=singlepred.df.list[[1]][[1]],
    aes(x=richness, y=fn.mean, ymax=fn.mean+2*fixedSE, ymin=fn.mean-2*fixedSE),
    fill="blue", alpha=0.3)+
  #Add line for mixed model predictions
  # geom_line(data=pred.df.list[[1]][[1]], aes(x=richness, y=avg.fn), col="red", lwd=1.5, alpha=0.9)+
  geom_line(data=singlepred.df.list[[1]][[1]], aes(x=richness, y=fn.mean), col="blue", lwd=1.5, alpha=0.9)+
  # scale_fill_manual(values=c("red", "blue"), name="")+
  coord_cartesian(ylim=c(-0.05, 1.1), xlim=c(-2, 62))+
  scale_x_continuous(breaks=c(1, 20, 40, 60))+
  scale_y_continuous(breaks=seq(0, 1, 0.2))+
  geom_text(data=data.frame(

```



```

      avg.fn=0)
#Generate predicted values for overall trend
newdata$avg.fn=predict(avgintmods.list[[i]],newdata,type="response",level=0)
#Obtain model matrix
mm=model.matrix(terms(avgintmods.list[[i]]),newdata)
#Obtain estimate of SE based on fixed effects only
newdata$fixedSE=sqrt(diag(mm %*% tcrossprod(vcov(avgintmods.list[[i]]),mm))
#Return dataframe
return(newdata)
} )

#Plot predicted values and confidence bands across all studies on top of fitted values for each individual
study
lapply(1:3,function(i) {
  ggplot()+
  #Plot raw points
  geom_point(data=multifunc.avg,aes(x=richness,y=avg.fn),size=2,col="grey60",alpha=0.5)+
  #Plot curves for each study
  #geom_line(data=pred.df.list[[i]][[2]],aes(x=richness,y=avg.fn,group=Study),alpha=0.75,lwd=1,alpha=0.75)+
  #Add confidence band for mixed model predictions based on fixed effects only
  geom_ribbon(data=predint.df.list[[i]],
    aes(x=richness,y=avg.fn,ymax=avg.fn+2*fixedSE,ymin=avg.fn-2*fixedSE,group=no.fn,fill=no.fn),
    alpha=0.15)+
  #Add line for mixed model predictions
  geom_line(data=predint.df.list[[i]],aes(x=richness,y=avg.fn,group=no.fn,col=no.fn),lwd=1.5,alpha=0.9)+
  scale_color_gradient(high="red",low="blue",name="Number of\nfunctions")+
  scale_fill_gradient(high="red",low="blue",name="Number of\nfunctions")+
  scale_y_continuous(breaks=seq(0,1,0.2))+
  labs(x="\nRichness",y="Average multifunctionality\n")+
  theme_bw(base_size=18)+
  theme(panel.grid.major=element_blank(),panel.grid.minor=element_blank())
} )

#Extract effect sizes and their standard errors for each level of number of functions
avginteffect.df.list=lapply(avgintmods.list,function(i) {
  ldply(2:max(multifunc.avg$no.fn),function(j)
    data.frame(
      no.fn=j,
      Estimate=summary(i)$tTable["log(richness)","Value"]+j*summary(i)$tTable["log(richness):no.fn","Value"],
      Std.Error=sqrt(
        (summary(i)$tTable["log(richness)","Std.Error"]^2+summary(i)$tTable["log(richness):no.fn","Std.Error"]^2+
          2*i$varFix["log(richness)","log(richness):no.fn"]) ) )
  ) } )

#Plot number of functions against effect size
lapply(avginteffect.df.list,function(i) {
  ggplot(i,aes(x=no.fn,y=Estimate))+
  #Add points for effect sizes
  geom_point(size=4)+
  #And error bars for the standard errors
  geom_errorbar(aes(ymax=Estimate+2*Std.Error,ymin=Estimate-2*Std.Error),width=0)+
  #Specify axis breaks
  scale_x_continuous(breaks=c(2,4,6,8,10,12))+
  labs(x="\nNumber of functions",y="Diversity effect (+/- 95% CI)\n")+
  theme_bw(base_size=18)+
  theme(panel.grid.major=element_blank(),panel.grid.minor=element_blank())
} )

#####
# MULTIPLICATIVE APPROACH
#####

#Calculate multiplicative level of functioning across all functions for each treatment, for each experiment
multifunc.mult=ddply(multifunc.scaled,c("Reference","Study","Expt","FTG","Sys1","Sys2"),function(x) {
  z=data.frame(
    richness=colnames(x[,Y.colnames]),
    no.fn=length(unique(x$Ydesc)),
    mult.fn=apply(x[,Y.colnames],2,prod),
    mult.fn.N=colSums(x[,N.colnames]) )
  #Remove rows where there is no response (i.e., mult.fn.scaled==NA)
  z=z[!is.na(z$mult.fn),]
  #Scale by nth root
  z$mult.fn.scaled=z$mult.fn^(1/nrow(x))
  #Set richness by splitting column names
  z$richness=suppressWarnings(ifelse(grepl("mono",z$richness),1,as.numeric(gsub("X{[0-9]+}.*","\\1",z$richness))))
  return(z) } )

#Investigate proper functional form to use
#Group data for random effects
multifunc.mult.grouped=groupedData(mult.fn.scaled~richness|Study,data=multifunc.mult)
#Fit different functional forms using non-linear mixed models
Null=nlme(mult.fn.scaled~a,fixed=a~1,random=~a~1,start=c(a=0.2),data=multifunc.mult.grouped)
Linear=nlme(mult.fn.scaled~a+b*richness,fixed=a+b~1,random=~a+b~1,start=c(a=1.5,b=1),data=multifunc.mult.grouped)
Logarithmic=nlme(mult.fn.scaled~a+b*log(richness),fixed=a+b~1,random=~a+b~1,start=c(a=1.5,b=1),data=multifunc.mult.grouped)

```

```

Power=nlme(mult.fn.scaled~a*richness^b,fixed=a+b~1,random=~a+b~1,start=c(a=0.2,b=2),data=multifunc.mult.groupe
d)
Saturating=nlme(mult.fn.scaled~richness/(k+richness),fixed=k~1,random=k~1,start=c(k=1),data=multifunc.mult.gro
uped)
#Compare models using AIC
AIC(Null,Linear,Logarithmic,Power,Saturating)

#Fit log relationship using linear mixed effects model, allowing slopes and intercepts to vary by Study
multmods.list=lapply(c("unweighted"),function(i) {
  #Subset dataset to include only non-NA data points for each type of analysis
  if(i=="variance") { multifunc.mult=multifunc.mult[!is.na(multifunc.mult$mult.fn.scaled.SD),]
  } else if(i=="sample.size") { multifunc.mult=multifunc.mult[!is.na(multifunc.mult$mult.fn.scaled.N),]
  } else { multifunc.mult }
  #Fit linear mixed effects model for each weighting scheme
  if(i=="unweighted") {
    mod=glmmPQL(mult.fn.scaled~log(richness),random=~richness|Study,family=quasibinomial(link="identity"),
               start=c(0.5,0),data=multifunc.mult,verbose=F)
  } else if(i=="variance") {

mod=glmmPQL(mult.fn.scaled~log(richness),random=~richness|Study,weights=1/((multifunc.mult$mult.fn.scaled.SD^2
)+0.01),
            family=quasibinomial(link="identity"),start=c(0.5,0),data=multifunc.mult,verbose=F)

  } else {

mod=glmmPQL(mult.fn.scaled~log(richness),random=~richness|Study,weights=sqrt(multifunc.mult$mult.fn.scaled.N),
            family=quasibinomial(link="identity"),start=c(0.5,0),data=multifunc.mult,verbose=F) }
  #Return model
  return(mod)
})
#Append reduced model (S <= 16)
multmods.list=append(multmods.list,list(update(multmods.list[[1]],data=subset(multifunc.mult,richness<=16))))
#Look at output and diagnostic plots
lapply(multmods.list,summary); lapply(multmods.list,plot)

#Extract predicted fits for plot
pred.df.list=lapply(seq_along(multmods.list),function(i) {
  if(i==1) multifunc.mult=multifunc.mult else multifunc.mult=subset(multifunc.mult,!paste(Study,Expt) %in%
unique(paste(subset(multifunc.mult,richness>16)$Study,subset(multifunc.mult,richness>16)$Expt)))
  #Modified from: http://glmm.wikidot.com/faq
  #Create dataframe for predicted values for overall fit

newdata=expand.grid(richness=1:max(multifunc.mult$richness),no.fn=2:max(multifunc.mult$no.fn),mult.fn.scaled=0
)
  #Generate predicted values for overall trend
  newdata$mult.fn.scaled=predict(multmods.list[[i]],newdata,type="response",level=0)
  #Obtain model matrix
  mm=model.matrix(terms(multmods.list[[i]]),newdata)
  #Obtain estimate of SE based on fixed effects only
  newdata$fixedSE=sqrt(diag(mm %*% tcrossprod(vcov(multmods.list[[i]]),mm))

  #Create dataframe for predicted values for each study
  newdata2=ldply(unique(multifunc.mult$Study),function(j)
    data.frame(Study=j,
               richness=1:max(subset(multifunc.mult,Study==j)$richness),
               no.fn=max(subset(multifunc.mult,Study==j)$no.fn) )
  #Generate predicted values for each study
  newdata2$mult.fn.scaled=predict(multmods.list[[i]],newdata2,type="response",level=1)

  #Return dataframes in a list
  list(newdata,newdata2)
})

#Plot predicted values and confidence bands across all studies on top of fitted values for each individual
study
avgplots.list=lapply(1,function(i) {
  ggplot()+
  #Plot raw points
  geom_point(data=multifunc.mult,aes(x=richness,y=mult.fn.scaled),size=2,col="grey60",alpha=0.5)+
  #Plot curves for each study

geom_line(data=pred.df.list[[i]][[2]],aes(x=richness,y=mult.fn.scaled,group=Study),col="black",lwd=0.8,alpha=0
.7)+
  #Add confidence band for mixed model predictions based on fixed effects only
  geom_ribbon(data=pred.df.list[[i]][[1]],
            aes(x=richness,y=mult.fn.scaled,ymax=mult.fn.scaled+2*fixedSE,ymin=mult.fn.scaled-2*fixedSE),
            fill="red",alpha=0.4)+
  #Add line for mixed model predictions
  geom_line(data=pred.df.list[[i]][[1]],aes(x=richness,y=mult.fn.scaled),col="red",lwd=1.5,alpha=0.9)+
  scale_x_continuous(breaks=c(1,20,40,60))+
  scale_y_continuous(limits=c(0,1.1),breaks=c(0,0.5,1))+
  labs(x="Richness",y="Average multifunctionality")+
  theme_bw(base_size=18)+
  theme(panel.grid.major=element_blank(),panel.grid.minor=element_blank())
})#; avgplots.list

#Plot figure 1 with inset from list above (5 x 4.5")
ggplot(data=subset(multifunc.mult,!paste(Study,Expt) %in%

```



```

unique(paste(subset(multifunc.mult, richness>16)$Study, subset(multifunc.mult, richness>16)$Expt)),
  aes(x=richness, y=mult.fn.scaled))+
#Plot raw points
geom_point(size=2.5, col="grey60", alpha=0.3)+
#Plot curves for each study

geom_line(data=pred.df.list[[2]][[2]], aes(x=richness, y=mult.fn.scaled, group=Study), col="grey20", lwd=0.75, alpha
=0.8)+
#Add confidence band for mixed model predictions based on fixed effects only
geom_ribbon(data=pred.df.list[[2]][[1]],
  aes(x=richness, y=mult.fn.scaled, ymax=mult.fn.scaled+2*fixedSE, ymin=mult.fn.scaled-2*fixedSE),
  fill="red", alpha=0.4)+
#Add line for mixed model predictions
geom_line(data=pred.df.list[[2]][[1]], aes(x=richness, y=mult.fn.scaled), col="red", lwd=2.5)+
coord_cartesian(ylim=c(-0.05, 1.1))+
scale_x_continuous(breaks=c(1, 4, 8, 12, 16), labels=c("1", "4", "8", "12", "16"))+
scale_y_continuous(breaks=seq(0, 1, 0.2))+
labs(x="Richness", y="Multiplicative multifunctionality")+
# geom_text(data=data.frame(
#   labels=letters[1]),
#   aes(x=-Inf, y=Inf, label=labels), vjust=1.5, hjust=-1.5, col="black", fontface="bold", size=9)+
theme_bw(base_size=18)+
theme(panel.grid.major=element_blank(), panel.grid.minor=element_blank()+

annotation_custom(grob=ggplotGrob(avgplots.list[[1]]+labs(x="", y="))+theme(plot.margin=unit(c(0, 0, 0, 0), "cm")))
,
  xmin=7, xmax=16, ymin=-0.075, ymax=0.385)

```

## 36 Supplementary References

- 37 1. Tilman, D., Reich, P. B. & Knops, J. M. H. Biodiversity and ecosystem stability in a decade-long  
38 grassland experiment. *Nature* **441**, 629–632 (2006).
- 39 2. Wardle, D. A., Yeates, G. W., Williamson, W. & Bonner, K. I. The response of a three trophic level  
40 soil food web to the identity and diversity of plant species and functional groups. *Oikos* **1**, 45–56  
41 (2003).
- 42 3. Ball, B. A., Bradford, M. A., Coleman, D. C. & Hunter, M. D. Linkages between below and  
43 aboveground communities: Decomposer responses to simulated tree species loss are largely  
44 additive. *Soil Biol. Biochem.* **41**, 1155–1163 (2009).
- 45 4. Bardgett, R. D. & Shine, A. Linkages between plant litter diversity, soil microbial biomass and  
46 ecosystem function in temperate grasslands. *Soil Biol. Biochem.* **31**, 317–321 (1999).
- 47 5. Reich, P. B. *et al.* Impacts of biodiversity loss escalate through time as redundancy fades. *Science*  
48 **336**, 589–592 (2012).
- 49 6. Hector, A. *et al.* Plant diversity and productivity experiments in European grasslands. *Science* **286**,  
50 1123–1127 (1999).
- 51 7. Blair, J. M., Parmelee, R. W. & Beare, M. H. Decay rates, nitrogen fluxes, and decomposer  
52 communities of single-and mixed-species foliar litter. *Ecology* **71**, 1976–1985 (1990).
- 53 8. Boyer, K. E., Kertesz, J. S. & Bruno, J. F. Biodiversity effects on productivity and stability of marine  
54 macroalgal communities: the role of environmental context. *Oikos* **118**, 1062–1072 (2009).
- 55 9. Bruno, J. F. & O'Connor, M. I. Cascading effects of predator diversity and omnivory in a marine  
56 food web. *Ecol. Lett.* **8**, 1048–1056 (2005).
- 57 10. Caliman, A. *et al.* Functional bioturbator diversity enhances benthic-pelagic processes and  
58 properties in experimental microcosms. *J. North Am. Benthol. Soc.* **26**, 450–459 (2007).
- 59 11. Cardinale, B. J. & Palmer, M. A. Disturbance Moderates Biodiversity–Ecosystem Function  
60 Relationships: Experimental Evidence From Caddisflies in Stream Mesocosms. *Ecology* **83**, 1915–  
61 1927 (2002).
- 62 12. Dang, C. K., Chauvet, E. & Gessner, M. O. Magnitude and variability of process rates in fungal  
63 diversity-litter decomposition relationships. *Ecol. Lett.* **8**, 1129–1137 (2005).
- 64 13. De Deyn, G. B. *et al.* Vegetation composition promotes carbon and nitrogen storage in model  
65 grassland communities of contrasting soil fertility. *J. Ecol.* **97**, 864–875 (2009).
- 66 14. Douglass, J. G., Duffy, J. E. & Bruno, J. F. Herbivore and predator diversity interactively affect  
67 ecosystem properties in an experimental marine community. *Ecol. Lett.* **11**, 598–608 (2008).

- 68 15. Duarte, S., Pascoal, C., Cássio, F. & Bärlocher, F. Aquatic hyphomycete diversity and identity  
69 affect leaf litter decomposition in microcosms. *Oecologia* **147**, 658–666 (2006).
- 70 16. Duffy, J. E., Richardson, J. P. & Canuel, E. A. Grazer diversity effects on ecosystem functioning in  
71 seagrass beds. *Ecol. Lett.* **6**, 637–645 (2003).
- 72 17. Duffy, J. E., Paul Richardson, J. & France, K. E. Ecosystem consequences of diversity depend on  
73 food chain length in estuarine vegetation. *Ecol. Lett.* **8**, 301–309 (2005).
- 74 18. Dzialowski, A. R. & Smith, V. H. Nutrient dependent effects of consumer identity and diversity on  
75 freshwater ecosystem function. *Freshw. Biol.* **53**, 148–158 (2007).
- 76 19. Gamfeldt, L., Hillebrand, H. & Jonsson, P. R. Species richness changes across two trophic levels  
77 simultaneously affect prey and consumer biomass. *Ecol. Lett.* **8**, 696–703 (2005).
- 78 20. Godbold, J. A., Solan, M. & Killham, K. Consumer and resource diversity effects on marine  
79 macroalgal decomposition. *Oikos* **118**, 77–86 (2009).
- 80 21. Hägele, B. F. & Rowell-Rahier, M. Dietary mixing in three generalist herbivores: nutrient  
81 complementation or toxin dilution? *Oecologia* **119**, 521–533 (1999).
- 82 22. Hättenschwiler, S. & Bretscher, D. Isopod effects on decomposition of litter produced under  
83 elevated CO<sub>2</sub>, N deposition and different soil types. *Glob. Chang. Biol.* **7**, 565–579 (2001).
- 84 23. Hillebrand, H., Gamfeldt, L., Jonsson, P. R. & Matthiessen, B. Consumer diversity indirectly  
85 changes prey nutrient content. *Mar. Ecol. Prog. Ser.* **380**, 33–41 (2009).
- 86 24. Allan, E. *et al.* A comparison of the strength of biodiversity effects across multiple functions.  
87 *Oecologia* **173**, 223–237 (2013).
- 88 25. Jiang, L. Negative selection effects suppress relationships between bacterial diversity and  
89 ecosystem functioning. *Ecology* **88**, 1075–1085 (2007).
- 90 26. Karanika, E. D., Alifragis, D. A., Mamolos, A. P. & Veresoglou, D. S. Differentiation between  
91 responses of primary productivity and phosphorus exploitation to species richness. *Plant Soil*  
92 **297**, 69–81 (2007).
- 93 27. Keith, A. M. *et al.* Increasing litter species richness reduces variability in a terrestrial decomposer  
94 system. *Ecology* **89**, 2657–2664 (2008).
- 95 28. King, R. F., Dromph, K. M. & Bardgett, R. D. Changes in species evenness of litter have no effect  
96 on decomposition processes. *Soil Biol. Biochem.* **34**, 1959–1963 (2002).
- 97 29. Laossi, K.-R. *et al.* Effects of plant diversity on plant biomass production and soil macrofauna in  
98 Amazonian pastures. *Pedobiologia*. **51**, 397–407 (2008).

- 99 30. Madritch, M. D. & Cardinale, B. J. Impacts of tree species diversity on litter decomposition in  
100 northern temperate forests of Wisconsin, USA: a multi-site experiment along a latitudinal  
101 gradient. *Plant Soil* **292**, 147–159 (2007).
- 102 31. Maestre, F. T. & Reynolds, J. F. Biomass responses to elevated CO<sub>2</sub>, soil heterogeneity and  
103 diversity: an experimental assessment with grassland assemblages. *Oecologia* **151**, 512–520  
104 (2007).
- 105 32. McKie, B. G. *et al.* Ecosystem functioning in stream assemblages from different regions:  
106 contrasting responses to variation in detritivore richness, evenness and density. *J. Anim. Ecol.* **77**,  
107 495–504 (2008).
- 108 33. McKie, B. G., Schindler, M., Gessner, M. O. & Malmqvist, B. Placing biodiversity and ecosystem  
109 functioning in context: environmental perturbations and the effects of species richness in a  
110 stream field experiment. *Oecologia* **160**, 757–70 (2009).
- 111 34. Meier, C. L. & Bowman, W. D. Links between plant litter chemistry, species diversity, and below-  
112 ground ecosystem function. *PNAS* **105**, 19780–19785 (2008).
- 113 35. Nilsson, E. *et al.* Effects of stream predator richness on the prey community and ecosystem  
114 attributes. *Oecologia* **157**, 641–651 (2008).
- 115 36. Power, L. D. & Cardinale, B. J. Species richness enhances both algal biomass and rates of oxygen  
116 production in aquatic microcosms. *Oikos* **118**, 1703–1711 (2009).
- 117 37. Redondo-Brenes, A. & Montagnini, F. Growth, productivity, aboveground biomass, and carbon  
118 sequestration of pure and mixed native tree plantations in the Caribbean lowlands of Costa Rica.  
119 *For. Ecol. Manage.* **232**, 168–178 (2006).
- 120 38. Ritchie, M. E. & Tilman, D. Predictions of species interactions from consumer-resource theory:  
121 experimental tests with grasshoppers and plants. *Oecologia* **94**, 516–527 (1993).
- 122 39. Rixen, C. & Mulder, C. P. H. Improved water retention links high species richness with increased  
123 productivity in arctic tundra moss communities. *Oecologia* **146**, 287–299 (2005).
- 124 40. Sanpera-Calbet, I., Lecerf, A. & Chauvet, E. Leaf diversity influences in-stream litter  
125 decomposition through effects on shredders. *Freshw. Biol.* **54**, 1671–1682 (2009).
- 126 41. Spaekova, I. & Leps, J. Procedure for separating the selection effect from other effects in  
127 diversity-productivity relationship. *Ecol. Lett.* **4**, 585–594 (2001).
- 128 42. Stachowicz, J. J., Graham, M., Bracken, M. E. S. & Szoboszlai, A. I. Diversity enhances cover and  
129 stability of seaweed assemblages: the role of heterogeneity and time. *Ecology* **89**, 3008–3019  
130 (2008).
- 131 43. Sullivan, G. & Zedler, J. B. Functional redundancy among tidal marsh halophytes: a test. *Oikos* **84**,  
132 246–260 (1999).

- 133 44. Sullivan, G., Callaway, J. C. & Zedler, J. B. Plant assemblage composition explains and predicts  
134 how biodiversity affects salt marsh functioning. *Ecol. Monogr.* **77**, 569–590 (2007).
- 135 45. Van Peer, L., Nijs, I., Reheul, D. & De Cauwer, B. Species richness and susceptibility to heat and  
136 drought extremes in synthesized grassland ecosystems: compositional vs physiological effects.  
137 *Funct. Ecol.* **18**, 769–778 (2004).
- 138 46. Von Felten, S. & Schmid, B. Complementarity among species in horizontal versus vertical rooting  
139 space. *J. Plant Ecol.* **1**, 33–41 (2008).
- 140 47. Wojdak, J. M. Relative strength of top-down, bottom-up, and consumer species richness effects  
141 on pond ecosystems. *Ecol. Monogr.* **75**, 489–504 (2005).
